# Supplementary material
Source: publisher figshare collection journal article supplement (https://gsajournals.figshare.com/ndownloader/files/10656826)
Supplement: Supplementary file 1 [file 10656826]

## Sheet: Sheet1
GO category	No. Genes	No. SNPs	hf	PA	SE	p value	FDR p value	Ontology	Term
GBLUP				0.12	0.033
GO:0022857	59	2563	0.527426	0.353887	0.0258721	6.77627e-08	7.68429e-05	MF	transmembrane transporter activity
GO:0006730	17	749	0.278498	0.274923	0.0288133	0.000213007	0.120775	BP	one-carbon metabolic process
GO:0006810	80	6893	0.439012	0.254105	0.0283384	0.000945334	0.357336	BP	transport
GO:0055114	368	22029	1	0.24687	0.028991	0.0017256	0.391366	BP	oxidation-reduction process
GO:0030866	21	2161	0.297733	0.246105	0.026607	0.00131642	0.373204	BP	cortical actin cytoskeleton organization
GO:0006839	15	798	0.216239	0.242459	0.0281999	0.00210315	0.397495	BP	mitochondrial transport
GO:0007160	15	4833	0.473135	0.233854	0.0332905	0.00651234	0.671363	BP	cell-matrix adhesion
GO:0000176	12	224	0.15591	0.231946	0.031309	0.00592057	0.671363	CC	nuclear exosome (RNase complex)
GO:0030529	21	3720	0.257685	0.227298	0.0293979	0.00642289	0.671363	CC	intracellular ribonucleoprotein complex
GO:0016199	29	13531	0.460918	0.223449	0.0267409	0.00623153	0.671363	BP	axon midline choice point recognition
GO:0016055	52	13210	0.451988	0.221473	0.0229731	0.00486018	0.671363	BP	Wnt signaling pathway
GO:0010181	11	1353	0.200919	0.209614	0.0297525	0.018211	0.788115	MF	FMN binding
GO:0005740	52	2122	0.23407	0.208134	0.0289923	0.0186194	0.788115	CC	mitochondrial envelope
GO:0008103	21	3121	0.170159	0.203031	0.0302025	0.0264731	0.788115	BP	oocyte microtubule cytoskeleton polarization
GO:0007291	45	4584	0.192512	0.201941	0.0287006	0.0253122	0.788115	BP	sperm individualization
GO:0006979	69	8933	0.397141	0.201238	0.0305907	0.0296894	0.788115	BP	response to oxidative stress
GO:0015450	21	289	0.158139	0.200874	0.0303183	0.0297062	0.788115	MF	P-P-bond-hydrolysis-driven protein transmembrane transporter activity
GO:0031625	12	292	0.121096	0.198296	0.0288254	0.0307404	0.788115	MF	ubiquitin protein ligase binding
GO:0050660	56	4326	0.366039	0.19438	0.0319894	0.0445242	0.788115	MF	flavin adenine dinucleotide binding
GO:0007409	52	14228	0.432119	0.194344	0.0280382	0.0357094	0.788115	BP	axonogenesis
GO:0005743	53	2253	0.233776	0.19433	0.0330251	0.0471566	0.788115	CC	mitochondrial inner membrane
GO:0016616	10	401	0.131885	0.191986	0.0293885	0.0431817	0.788115	MF	oxidoreductase activity, acting on the CH-OH group of donors, NAD or NADP as acceptor
GO:0060857	14	2517	0.261136	0.191244	0.0311418	0.0490156	0.788115	BP	establishment of glial blood-brain barrier
GO:2001020	15	5553	0.233044	0.190781	0.0289837	0.0447177	0.788115	BP	regulation of response to DNA damage stimulus
GO:0004601	16	2420	0.23659	0.188516	0.0280248	0.0473198	0.788115	MF	peroxidase activity
GO:0070983	21	6126	0.369651	0.186874	0.0337627	0.0668831	0.788115	BP	dendrite guidance
GO:0007179	23	5555	0.248707	0.186833	0.02634	0.0470475	0.788115	BP	transforming growth factor beta receptor signaling pathway
GO:0019991	27	4711	0.287321	0.181675	0.0291486	0.0679767	0.788115	BP	septate junction assembly
GO:0022008	545	37755	1	0.181372	0.030047	0.0715406	0.788115	BP	neurogenesis
GO:0051299	10	790	0.139541	0.179667	0.0298986	0.0763673	0.788115	BP	centrosome separation
GO:0007017	45	6171	0.270668	0.174828	0.0296525	0.0921656	0.788115	BP	microtubule-based process
GO:0015992	31	1301	0.214653	0.174331	0.0320397	0.102064	0.788115	BP	proton transport
GO:0006974	93	6557	0.203729	0.173205	0.0299961	0.0994468	0.788115	BP	cellular response to DNA damage stimulus
GO:0005813	66	6480	0.327899	0.172349	0.0300401	0.102959	0.788115	CC	centrosome
GO:0016197	21	638	0.134369	0.168227	0.0287862	0.115906	0.788115	BP	endosomal transport
GO:0005737	832	101916	1	0.16625	0.0303116	0.130331	0.788115	CC	cytoplasm
GO:0020037	130	12768	0.291858	0.165647	0.0303854	0.133453	0.788115	MF	heme binding
GO:0007286	38	7690	0.168	0.165325	0.0286644	0.128804	0.788115	BP	spermatid development
GO:0006338	34	2238	0.196866	0.165242	0.0326566	0.143668	0.788115	BP	chromatin remodeling
GO:0052689	36	2261	0.124454	0.164205	0.0301222	0.139491	0.788115	MF	carboxylic ester hydrolase activity
GO:0003730	24	8070	0.173745	0.162015	0.0283879	0.144283	0.788115	MF	mRNA 3'-UTR binding
GO:0005097	27	2303	0.173438	0.161134	0.0312246	0.159254	0.788115	NA	NA
GO:0000077	12	1443	0.101648	0.160465	0.0312534	0.162938	0.788115	BP	DNA damage checkpoint
GO:0007436	12	2740	0.181301	0.160309	0.0323784	0.167908	0.788115	BP	larval salivary gland morphogenesis
GO:0008017	91	12192	0.363808	0.160184	0.032428	0.168765	0.788115	MF	microtubule binding
GO:0007617	10	6081	0.364909	0.158152	0.0321239	0.17889	0.788115	BP	mating behavior
GO:0003777	47	6550	0.261195	0.156959	0.0313739	0.182983	0.788115	MF	microtubule motor activity
GO:0009408	62	3744	0.240488	0.155665	0.0338455	0.199494	0.788115	BP	response to heat
GO:0042734	12	6034	0.27525	0.15521	0.0318413	0.194981	0.788115	CC	presynaptic membrane
GO:0000398	199	9055	0.267569	0.153421	0.0322618	0.207375	0.788115	BP	mRNA splicing, via spliceosome
GO:0042834	16	753	0.157198	0.15293	0.0325423	0.211409	0.788115	MF	peptidoglycan binding
GO:0009055	121	4153	0.263089	0.152184	0.0302541	0.208023	0.788115	MF	electron carrier activity
GO:0007530	19	3916	0.1624	0.152142	0.0310291	0.211029	0.788115	BP	sex determination
GO:0005874	30	3080	0.196928	0.15175	0.0310264	0.213522	0.788115	CC	microtubule
GO:0000184	12	577	0.136555	0.151352	0.0331209	0.223372	0.788115	BP	nuclear-transcribed mRNA catabolic process, nonsense-mediated decay
GO:0007608	84	11090	0.290404	0.149346	0.0309385	0.228948	0.788115	BP	sensory perception of smell
GO:0090302	11	515	0.0915898	0.148655	0.0336064	0.242548	0.788115	MF	APC-Cdc20 complex activity
GO:0003676	386	40629	0.623855	0.148063	0.0319672	0.241048	0.788115	MF	nucleic acid binding
GO:0030317	10	982	0.122348	0.147852	0.0314317	0.240698	0.788115	BP	sperm motility
GO:0048102	59	7853	0.406396	0.147584	0.0342376	0.251759	0.788115	BP	autophagic cell death
GO:0005918	27	6036	0.22809	0.147423	0.030432	0.24031	0.788115	CC	septate junction
GO:0008328	10	1598	0.155951	0.14732	0.0322323	0.246978	0.788115	CC	ionotropic glutamate receptor complex
GO:0006952	94	6853	0.310426	0.146973	0.0322265	0.249338	0.788115	BP	defense response
GO:0004190	15	365	0.101305	0.146945	0.0292736	0.239788	0.788115	MF	aspartic-type endopeptidase activity
GO:0007155	120	35003	0.720217	0.146446	0.0286364	0.241214	0.788115	BP	cell adhesion
GO:0009116	11	610	0.117195	0.146041	0.0320545	0.255227	0.788115	BP	nucleoside metabolic process
GO:0003678	10	478	0.128824	0.145272	0.0321754	0.261001	0.788115	MF	DNA helicase activity
GO:0005506	141	7937	0.223723	0.144515	0.0313974	0.263925	0.788115	MF	iron ion binding
GO:0005680	15	564	0.0865808	0.143471	0.0335683	0.278068	0.788115	CC	anaphase-promoting complex
GO:0035195	11	540	0.118836	0.14204	0.0302175	0.27845	0.788115	BP	gene silencing by miRNA
GO:0000166	177	35476	0.382206	0.141918	0.0311654	0.282183	0.788115	MF	nucleotide binding
GO:0045433	20	5744	0.172742	0.14121	0.0305926	0.285807	0.788115	BP	male courtship behavior, veined wing generated song production
GO:0006333	12	481	0.128443	0.139893	0.0306344	0.295952	0.788115	BP	chromatin assembly or disassembly
GO:0061343	12	2232	0.146747	0.139487	0.0313101	0.300948	0.788115	BP	cell adhesion involved in heart morphogenesis
GO:0019992	25	5693	0.182142	0.138851	0.0317307	0.30697	0.788115	MF	diacylglycerol binding
GO:0033227	25	1391	0.146752	0.137784	0.0287182	0.307243	0.788115	BP	dsRNA transport
GO:0003729	176	32677	0.398986	0.137252	0.0317307	0.319345	0.788115	MF	mRNA binding
GO:0019901	25	5347	0.189055	0.136903	0.0328921	0.324991	0.788115	MF	protein kinase binding
GO:0007411	162	56648	1	0.136795	0.0295341	0.317332	0.788115	BP	axon guidance
GO:0016028	26	5158	0.228158	0.136571	0.0318177	0.324896	0.788115	CC	rhabdomere
GO:0004984	58	1704	0.203485	0.136489	0.0325231	0.327285	0.788115	MF	olfactory receptor activity
GO:0035234	11	829	0.129035	0.135669	0.0305991	0.329057	0.788115	BP	ectopic germ cell programmed cell death
GO:0061057	13	659	0.0670087	0.13562	0.030873	0.330114	0.788115	BP	peptidoglycan recognition protein signaling pathway
GO:0008285	37	11308	0.249896	0.13532	0.0304421	0.331497	0.788115	BP	negative regulation of cell proliferation
GO:0048786	16	5319	0.239826	0.133673	0.0303208	0.344639	0.788115	CC	presynaptic active zone
GO:0035317	19	6534	0.143996	0.132954	0.0320678	0.354323	0.788115	BP	imaginal disc-derived wing hair organization
GO:0030135	15	499	0.104095	0.132228	0.0341766	0.364465	0.788115	CC	coated vesicle
GO:0045892	84	10951	0.29647	0.132207	0.0334187	0.363113	0.788115	BP	negative regulation of transcription, DNA-templated
GO:0007394	12	1469	0.142485	0.131222	0.0341687	0.372434	0.788115	BP	dorsal closure, elongation of leading edge cells
GO:0007432	14	5529	0.220547	0.131102	0.0334838	0.372109	0.788115	BP	salivary gland boundary specification
GO:0003796	16	389	0.0432445	0.13073	0.0320833	0.372498	0.788115	MF	lysozyme activity
GO:0006334	19	448	0.12257	0.130307	0.0313269	0.374591	0.788115	BP	nucleosome assembly
GO:0035147	20	9719	0.203025	0.129195	0.0319639	0.384999	0.788115	BP	branch fusion, open tracheal system
GO:0005744	17	206	0.0920033	0.128846	0.0318611	0.387731	0.788115	CC	mitochondrial inner membrane presequence translocase complex
GO:0002168	27	5258	0.140799	0.128797	0.03117	0.386994	0.788115	BP	instar larval development
GO:0008586	45	18536	0.231648	0.128757	0.0311359	0.387275	0.788115	BP	imaginal disc-derived wing vein morphogenesis
GO:0007549	13	672	0.113298	0.128092	0.0329675	0.395786	0.788115	BP	dosage compensation
GO:0030674	10	527	0.0814799	0.128019	0.0318785	0.394694	0.788115	MF	protein binding, bridging
GO:0007184	11	460	0.084157	0.127506	0.0316452	0.398654	0.788115	BP	SMAD protein import into nucleus
GO:0016327	16	4164	0.158425	0.127397	0.0303886	0.397679	0.788115	CC	apicolateral plasma membrane
GO:0006626	25	589	0.120337	0.127378	0.0354298	0.405261	0.788115	BP	protein targeting to mitochondrion
GO:0051225	26	2216	0.169748	0.12698	0.0318423	0.403398	0.788115	BP	spindle assembly
GO:0050661	13	1390	0.0920814	0.126216	0.0315016	0.409405	0.788115	MF	NADP binding
GO:0006909	198	20274	0.32727	0.126211	0.0297905	0.407104	0.788115	BP	phagocytosis
GO:0046982	101	11821	0.339817	0.125643	0.0334932	0.416827	0.788115	MF	protein heterodimerization activity
GO:0035011	28	5234	0.222833	0.125547	0.0316335	0.41529	0.788115	BP	melanotic encapsulation of foreign target
GO:0060070	18	6181	0.143451	0.125258	0.0306821	0.416572	0.788115	BP	canonical Wnt signaling pathway
GO:0030727	12	4006	0.0752503	0.125179	0.0308055	0.417416	0.788115	BP	germarium-derived female germ-line cyst formation
GO:0007281	34	8366	0.131502	0.125164	0.0322409	0.419303	0.788115	BP	germ cell development
GO:0048100	11	4972	0.127922	0.124267	0.0322377	0.426928	0.788115	BP	wing disc anterior/posterior pattern formation
GO:0007018	78	8716	0.217197	0.124248	0.0330489	0.427978	0.788115	BP	microtubule-based movement
GO:0007619	27	9145	0.230966	0.124239	0.0321129	0.427022	0.788115	BP	courtship behavior
GO:0005829	154	8086	0.255501	0.124071	0.0295679	0.425665	0.788115	CC	cytosol
GO:0031532	11	3015	0.128053	0.124042	0.0333993	0.430083	0.788115	BP	actin cytoskeleton reorganization
GO:0017022	31	2656	0.164919	0.123572	0.0299129	0.430449	0.788115	MF	myosin binding
GO:0035556	75	16668	0.245117	0.122869	0.0327193	0.439307	0.788115	BP	intracellular signal transduction
GO:0008094	14	804	0.0974059	0.122362	0.032866	0.443745	0.788115	MF	DNA-dependent ATPase activity
GO:0030718	37	8762	0.321569	0.12197	0.0296232	0.444408	0.788115	BP	germ-line stem cell population maintenance
GO:0043190	42	5789	0.249951	0.12144	0.0301522	0.449549	0.788115	CC	ATP-binding cassette (ABC) transporter complex
GO:0007163	30	7535	0.149742	0.121057	0.0315253	0.453918	0.788115	BP	establishment or maintenance of cell polarity
GO:0035151	19	2209	0.104798	0.120062	0.0346947	0.464344	0.788115	BP	regulation of tube size, open tracheal system
GO:0002230	10	472	0.0581155	0.119954	0.0306177	0.463014	0.788115	BP	positive regulation of defense response to virus by host
GO:0008513	24	1590	0.0695781	0.119929	0.035455	0.46585	0.788115	MF	secondary active organic cation transmembrane transporter activity
GO:0006378	18	4075	0.0675574	0.119828	0.0316937	0.464716	0.788115	BP	mRNA polyadenylation
GO:0007275	29	4866	0.0822685	0.11911	0.031656	0.470942	0.788115	BP	multicellular organism development
GO:0016477	23	10114	0.224771	0.119106	0.0329902	0.471566	0.788115	BP	cell migration
GO:0051491	15	4672	0.195917	0.119007	0.0321885	0.47207	0.788115	BP	positive regulation of filopodium assembly
GO:0005839	21	265	0.0590589	0.1189	0.0316321	0.472771	0.788115	CC	proteasome core complex
GO:0004089	16	1436	0.144599	0.118734	0.0319715	0.474345	0.788115	MF	carbonate dehydratase activity
GO:0046330	14	3142	0.108759	0.118516	0.0326576	0.47649	0.788115	BP	positive regulation of JNK cascade
GO:0007427	34	14113	0.285647	0.118325	0.0311575	0.477621	0.788115	BP	epithelial cell migration, open tracheal system
GO:0042078	21	9420	0.151432	0.117975	0.0315963	0.480827	0.788115	BP	germ-line stem cell division
GO:0048066	13	2510	0.098991	0.117807	0.032891	0.482646	0.788115	BP	developmental pigmentation
GO:0032313	26	1928	0.0919531	0.117711	0.0332319	0.48355	0.788115	NA	NA
GO:0004722	33	2785	0.161433	0.117419	0.0309415	0.485549	0.788115	MF	protein serine/threonine phosphatase activity
GO:0006281	61	2116	0.10239	0.117342	0.0336548	0.48678	0.788115	BP	DNA repair
GO:0007527	12	1497	0.0548298	0.116558	0.0317967	0.493236	0.788115	BP	adult somatic muscle development
GO:0046425	12	673	0.0935505	0.116544	0.031904	0.493368	0.788115	BP	regulation of JAK-STAT cascade
GO:0016298	30	1297	0.13089	0.116438	0.0338332	0.494461	0.788115	MF	lipase activity
GO:0005741	16	443	0.0534609	0.116434	0.0301388	0.494173	0.788115	CC	mitochondrial outer membrane
GO:0051287	30	1261	0.0878311	0.116269	0.0327165	0.495821	0.788115	MF	NAD binding
GO:0003015	11	3394	0.140807	0.116173	0.0348075	0.496751	0.788115	BP	heart process
GO:0007370	17	2140	0.11417	0.11601	0.0324459	0.498035	0.788115	BP	ventral furrow formation
GO:0043130	10	340	0.0466287	0.116008	0.0320139	0.498041	0.788115	MF	ubiquitin binding
GO:0016334	11	2164	0.103143	0.115976	0.030656	0.498284	0.788115	BP	establishment or maintenance of polarity of follicular epithelium
GO:0008431	11	385	0.0437777	0.115949	0.0329012	0.498577	0.788115	MF	vitamin E binding
GO:0016705	81	2840	0.140583	0.115561	0.0306689	0.501971	0.788115	MF	oxidoreductase activity, acting on paired donors, with incorporation or reduction of molecular oxygen
GO:0009306	32	1618	0.142356	0.115457	0.0327926	0.502797	0.788115	BP	protein secretion
GO:0017148	32	12923	0.158303	0.115428	0.0311842	0.503124	0.788115	BP	negative regulation of translation
GO:0045089	33	1340	0.080826	0.115371	0.0327284	0.503543	0.788115	BP	positive regulation of innate immune response
GO:0008407	44	12280	0.124177	0.115298	0.0320216	0.504214	0.788115	BP	chaeta morphogenesis
GO:0035214	14	2365	0.118578	0.115147	0.0328914	0.505449	0.788115	BP	eye-antennal disc development
GO:0007219	45	8757	0.102031	0.115034	0.032579	0.506447	0.788115	BP	Notch signaling pathway
GO:0005769	33	5112	0.135056	0.114961	0.0301698	0.507343	0.788115	CC	early endosome
GO:0046843	43	10753	0.218116	0.114479	0.0328573	0.511182	0.788115	BP	dorsal appendage formation
GO:0048132	12	2423	0.0747482	0.114452	0.0316046	0.511636	0.788115	BP	female germ-line stem cell asymmetric division
GO:0008536	17	645	0.0950443	0.114018	0.033396	0.515013	0.788115	MF	Ran GTPase binding
GO:0004016	14	3236	0.178317	0.113915	0.0343312	0.515661	0.788115	MF	adenylate cyclase activity
GO:0035220	81	11515	0.164633	0.113414	0.0323281	0.520485	0.788115	BP	wing disc development
GO:0035206	28	10238	0.198704	0.113128	0.0331512	0.522666	0.788115	BP	regulation of hemocyte proliferation
GO:0005876	14	3000	0.0676971	0.113085	0.0338064	0.522802	0.788115	CC	spindle microtubule
GO:0006355	354	60099	7.30886e-10	0.112946	0.03342	0.524116	0.788115	BP	regulation of transcription, DNA-templated
GO:0043065	17	4340	0.130731	0.112942	0.034623	0.523711	0.788115	BP	positive regulation of apoptotic process
GO:0003723	136	18728	0.226814	0.11263	0.0324956	0.527185	0.788115	MF	RNA binding
GO:0043565	227	42574	4.05822e-09	0.112533	0.0335927	0.527548	0.788115	MF	sequence-specific DNA binding
GO:0038032	10	2055	0.0787125	0.112503	0.0328138	0.528134	0.788115	BP	termination of G-protein coupled receptor signaling pathway
GO:0043025	56	7356	0.271561	0.112395	0.033779	0.528636	0.788115	CC	neuronal cell body
GO:0005578	54	15111	0.275545	0.112238	0.0339559	0.529878	0.788115	CC	proteinaceous extracellular matrix
GO:0007390	20	5610	0.151868	0.112214	0.0342668	0.529943	0.788115	BP	germ-band shortening
GO:0003700	392	80233	1.2359e-09	0.112059	0.0335053	0.531602	0.788115	MF	transcription factor activity, sequence-specific DNA binding
GO:0046620	16	3420	0.090523	0.111991	0.0330984	0.532379	0.788115	BP	regulation of organ growth
GO:0016788	14	791	0.115312	0.11185	0.0312637	0.534537	0.788115	MF	hydrolase activity, acting on ester bonds
GO:0007517	69	18029	0.149565	0.111667	0.0333536	0.535005	0.788115	BP	muscle organ development
GO:0035158	11	1883	0.0772007	0.111396	0.0331821	0.5374	0.788115	BP	regulation of tube diameter, open tracheal system
GO:0030425	38	9331	0.153727	0.110968	0.0325994	0.541397	0.788115	CC	dendrite
GO:0006959	19	534	0.0886339	0.110391	0.0307326	0.547673	0.788115	BP	humoral immune response
GO:0009790	48	10000	0.128109	0.110149	0.0320144	0.548845	0.788115	BP	embryo development
GO:0008150	1224	71179	1.19081e-11	0.110043	0.0337745	0.548448	0.788115	BP	biological_process
GO:0048813	172	37574	0.272122	0.110003	0.032525	0.549713	0.788115	BP	dendrite morphogenesis
GO:0003677	442	47728	2.11722e-11	0.109964	0.0333973	0.549393	0.788115	MF	DNA binding
GO:0000785	57	3238	0.123953	0.109944	0.0351719	0.548243	0.788115	CC	chromatin
GO:0045944	174	30787	1.87844e-10	0.10976	0.0335528	0.550991	0.788115	BP	positive regulation of transcription from RNA polymerase II promoter
GO:0005777	68	4156	0.109107	0.109441	0.0320162	0.554944	0.788115	CC	peroxisome
GO:0006508	532	33079	6.82124e-10	0.109385	0.0334738	0.554215	0.788115	BP	proteolysis
GO:0043695	13	381	0.0535698	0.109332	0.0328799	0.555154	0.788115	BP	detection of pheromone
GO:0000090	11	378	0.0776373	0.109088	0.0332027	0.556944	0.788115	BP	mitotic anaphase
GO:0004725	40	12180	0.25715	0.109026	0.0322164	0.558338	0.788115	MF	protein tyrosine phosphatase activity
GO:0016998	11	662	0.0381521	0.109023	0.0339968	0.556802	0.788115	BP	cell wall macromolecule catabolic process
GO:0007416	25	9208	0.171309	0.108987	0.0337099	0.557356	0.788115	BP	synapse assembly
GO:0042626	53	6955	0.199683	0.108985	0.0316545	0.559188	0.788115	MF	ATPase activity, coupled to transmembrane movement of substances
GO:0031987	15	4320	0.10812	0.108903	0.0337864	0.557993	0.788115	BP	locomotion involved in locomotory behavior
GO:0008045	57	27940	0.49705	0.108812	0.0313338	0.560981	0.788115	BP	motor neuron axon guidance
GO:0016318	28	13357	1.819e-09	0.108797	0.0336377	0.559013	0.788115	BP	ommatidial rotation
GO:0008587	29	9700	0.111129	0.108678	0.0321735	0.561357	0.788115	BP	imaginal disc-derived wing margin morphogenesis
GO:0000381	56	8038	0.109461	0.10846	0.0326516	0.562771	0.788115	BP	regulation of alternative mRNA splicing, via spliceosome
GO:0050916	10	1056	0.072718	0.108353	0.0328251	0.563508	0.788115	BP	sensory perception of sweet taste
GO:0000281	47	4187	1.14081e-09	0.108307	0.0334565	0.563292	0.788115	BP	mitotic cytokinesis
GO:0030707	56	14468	2.48655e-09	0.108264	0.0334817	0.563629	0.788115	BP	ovarian follicle cell development
GO:0012501	15	1377	0.100584	0.108262	0.0329216	0.564182	0.788115	BP	programmed cell death
GO:0031012	130	11392	2.98255e-09	0.108222	0.0334836	0.563977	0.788115	CC	extracellular matrix
GO:0004222	80	9364	3.33659e-09	0.108126	0.0334585	0.56481	0.788115	MF	metalloendopeptidase activity
GO:0042332	20	8027	2.02549e-09	0.108066	0.033471	0.565297	0.788115	BP	gravitaxis
GO:0009880	22	4743	1.70097e-09	0.107972	0.0334292	0.566126	0.788115	BP	embryonic pattern specification
GO:0007298	100	27275	1.85157e-10	0.107943	0.0333806	0.56642	0.788115	BP	border follicle cell migration
GO:0008157	27	5602	1.58378e-09	0.107935	0.033549	0.566322	0.788115	MF	protein phosphatase 1 binding
GO:0007507	57	19757	3.29958e-09	0.107887	0.03365	0.56662	0.788115	BP	heart development
GO:0046580	17	4903	0.132325	0.107884	0.0328953	0.56741	0.788115	BP	negative regulation of Ras protein signal transduction
GO:0005700	110	9723	3.08007e-09	0.107817	0.0334712	0.567385	0.788115	CC	polytene chromosome
GO:0007474	50	18636	2.46116e-09	0.107784	0.0334494	0.567686	0.788115	BP	imaginal disc-derived wing vein specification
GO:0007415	10	6730	3.54213e-09	0.107777	0.0334605	0.567734	0.788115	BP	defasciculation of motor neuron axon
GO:0005515	587	102966	1	0.107766	0.0317863	0.569559	0.788115	MF	protein binding
GO:0005783	163	11832	1.69183e-09	0.107717	0.0334842	0.568209	0.788115	CC	endoplasmic reticulum
GO:0006915	45	3656	9.91458e-10	0.107713	0.0334865	0.568242	0.788115	BP	apoptotic process
GO:0032504	215	8998	1.87779e-09	0.107711	0.0334183	0.568329	0.788115	BP	multicellular organism reproduction
GO:0070588	13	3827	0.135839	0.107708	0.0329023	0.568886	0.788115	BP	calcium ion transmembrane transport
GO:0005739	264	10653	4.81634e-09	0.10762	0.0335237	0.568979	0.788115	CC	mitochondrion
GO:0005615	368	21492	3.47303e-09	0.107608	0.0334391	0.569166	0.788115	CC	extracellular space
GO:0006511	76	4282	1.77374e-09	0.107607	0.0334754	0.569136	0.788115	BP	ubiquitin-dependent protein catabolic process
GO:0009987	48	8641	1.51893e-09	0.107528	0.0334755	0.569804	0.788115	BP	cellular process
GO:0004221	29	3029	1.35664e-09	0.107522	0.0334737	0.569855	0.788115	NA	NA
GO:0008345	24	8094	2.35463e-09	0.10751	0.033444	0.569982	0.788115	BP	larval locomotory behavior
GO:0007389	21	5160	3.2571e-09	0.107492	0.0334922	0.570082	0.788115	BP	pattern specification process
GO:0042048	46	11049	2.8353e-09	0.107489	0.0334789	0.570127	0.788115	BP	olfactory behavior
GO:0004252	269	11750	4.38408e-09	0.107479	0.0334036	0.570289	0.788115	MF	serine-type endopeptidase activity
GO:0008356	26	8085	1.95217e-09	0.107463	0.0336045	0.57021	0.788115	BP	asymmetric cell division
GO:0008361	16	3364	1.85918e-09	0.10743	0.0334848	0.570614	0.788115	BP	regulation of cell size
GO:0005102	27	4334	2.3878e-09	0.107401	0.0334976	0.570842	0.788115	MF	receptor binding
GO:0040007	22	4195	1.85831e-09	0.10737	0.033544	0.571052	0.788115	BP	growth
GO:0008083	29	7034	1.59195e-09	0.107358	0.0335217	0.571175	0.788115	MF	growth factor activity
GO:0045178	12	2964	1.01103e-09	0.107333	0.0335038	0.571405	0.788115	CC	basal part of cell
GO:0005326	18	2548	1.33486e-09	0.107306	0.0335003	0.571629	0.788115	MF	neurotransmitter transporter activity
GO:0061331	11	3653	1.63751e-09	0.107305	0.0334771	0.571663	0.788115	BP	epithelial cell proliferation involved in Malpighian tubule morphogenesis
GO:0007520	31	10518	3.33903e-09	0.10727	0.0334483	0.571985	0.788115	BP	myoblast fusion
GO:0046667	10	2776	1.43562e-09	0.107241	0.0335002	0.572171	0.788115	BP	compound eye retinal cell programmed cell death
GO:0007498	67	16049	1.78293e-09	0.107234	0.0334531	0.572287	0.788115	BP	mesoderm development
GO:0030713	17	2779	2.04186e-09	0.107228	0.0334944	0.572289	0.788115	BP	ovarian follicle cell stalk formation
GO:0000977	30	3674	1.72678e-09	0.107222	0.033465	0.572374	0.788115	MF	RNA polymerase II regulatory region sequence-specific DNA binding
GO:0007367	26	5559	1.79842e-09	0.107194	0.0334843	0.572581	0.788115	BP	segment polarity determination
GO:0016614	18	1294	8.99721e-10	0.107181	0.0334854	0.572691	0.788115	MF	oxidoreductase activity, acting on CH-OH group of donors
GO:0007519	14	6633	1.24033e-09	0.107177	0.0335239	0.572682	0.788115	BP	skeletal muscle tissue development
GO:0008061	107	7430	2.45232e-09	0.107169	0.033544	0.572728	0.788115	MF	chitin binding
GO:0048803	14	3176	2.44408e-09	0.107134	0.033469	0.573104	0.788115	BP	imaginal disc-derived male genitalia morphogenesis
GO:0008236	32	3510	2.32882e-09	0.107129	0.0335081	0.573101	0.788115	MF	serine-type peptidase activity
GO:0007464	16	8229	2.88158e-09	0.107127	0.0335976	0.573022	0.788115	BP	R3/R4 cell fate commitment
GO:0008595	35	5101	2.89579e-09	0.107118	0.033467	0.57324	0.788115	BP	anterior/posterior axis specification, embryo
GO:0019904	17	2989	1.64216e-09	0.107111	0.0334679	0.573296	0.788115	MF	protein domain specific binding
GO:0007501	11	2546	1.62249e-09	0.107104	0.0334962	0.573325	0.788115	BP	mesodermal cell fate specification
GO:0007346	34	2820	1.40401e-09	0.107101	0.0334579	0.573389	0.788115	BP	regulation of mitotic cell cycle
GO:0008363	12	592	0.0590948	0.10709	0.033002	0.573986	0.788115	BP	larval chitin-based cuticle development
GO:0007622	12	2824	1.26948e-09	0.107075	0.0334721	0.573593	0.788115	BP	rhythmic behavior
GO:0040003	141	7778	3.47229e-11	0.10706	0.0334826	0.573704	0.788115	BP	chitin-based cuticle development
GO:0051276	29	1577	1.60088e-09	0.107058	0.0335049	0.573695	0.788115	BP	chromosome organization
GO:0043231	86	2636	0.1244	0.107054	0.031342	0.576173	0.788115	CC	intracellular membrane-bounded organelle
GO:0045880	11	1511	1.13747e-09	0.107042	0.0335171	0.573817	0.788115	BP	positive regulation of smoothened signaling pathway
GO:0005328	20	2399	1.52334e-09	0.107042	0.0334935	0.573845	0.788115	MF	neurotransmitter:sodium symporter activity
GO:0016325	16	2552	1.39388e-09	0.107031	0.033466	0.573968	0.788115	BP	oocyte microtubule cytoskeleton organization
GO:0016459	20	4078	2.64951e-10	0.107027	0.0335079	0.573953	0.788115	CC	myosin complex
GO:0007469	10	2447	1.54249e-09	0.107017	0.0334891	0.574055	0.788115	BP	antennal development
GO:0016042	34	2299	0.195726	0.107006	0.0355954	0.571827	0.788115	BP	lipid catabolic process
GO:0007297	12	3874	2.79309e-09	0.107003	0.0334758	0.57419	0.788115	BP	ovarian follicle cell migration
GO:0008219	11	1945	1.26391e-09	0.106995	0.0334915	0.574234	0.788115	BP	cell death
GO:0040018	23	2384	7.0482e-10	0.106991	0.0334836	0.574278	0.788115	BP	positive regulation of multicellular organism growth
GO:0003684	21	891	8.18105e-10	0.106977	0.0334918	0.574391	0.788115	MF	damaged DNA binding
GO:0006836	22	3441	1.67657e-09	0.106972	0.0334792	0.574446	0.788115	BP	neurotransmitter transport
GO:0048488	29	4012	2.15195e-09	0.106951	0.0334752	0.57462	0.788115	BP	synaptic vesicle endocytosis
GO:0016339	23	9271	2.68071e-09	0.106947	0.033546	0.574577	0.788115	BP	calcium-dependent cell-cell adhesion via plasma membrane cell adhesion molecules
GO:0045927	10	2129	1.51219e-09	0.106944	0.0335201	0.574627	0.788115	BP	positive regulation of growth
GO:0000123	17	1258	1.32024e-09	0.10694	0.0334947	0.574695	0.788115	CC	histone acetyltransferase complex
GO:0014019	13	3157	2.18801e-09	0.106915	0.0335422	0.574852	0.788115	BP	neuroblast development
GO:0009593	46	2375	1.56488e-09	0.106907	0.0335185	0.574939	0.788115	BP	detection of chemical stimulus
GO:0030286	29	4128	8.70086e-10	0.106906	0.0336038	0.574853	0.788115	CC	dynein complex
GO:0045886	32	7915	4.15321e-09	0.106902	0.03349	0.575012	0.788115	BP	negative regulation of synaptic growth at neuromuscular junction
GO:0042246	11	3826	2.12124e-09	0.106895	0.0335453	0.575012	0.788115	BP	tissue regeneration
GO:0006486	32	1432	9.48432e-10	0.106893	0.0335092	0.575068	0.788115	BP	protein glycosylation
GO:0051568	16	827	5.3973e-10	0.10689	0.0335194	0.575079	0.788115	BP	histone H3-K4 methylation
GO:0030536	15	2750	2.08718e-09	0.106877	0.0334915	0.575226	0.788115	BP	larval feeding behavior
GO:0007224	32	3720	3.39244e-09	0.106874	0.03352	0.575213	0.788115	BP	smoothened signaling pathway
GO:0030708	10	2297	1.83743e-09	0.106873	0.0334817	0.575271	0.788115	BP	germarium-derived female germ-line cyst encapsulation
GO:0001522	11	764	6.62331e-10	0.106864	0.0334925	0.575329	0.788115	BP	pseudouridine synthesis
GO:0035019	14	3417	3.03964e-09	0.106837	0.0335386	0.575501	0.788115	BP	somatic stem cell population maintenance
GO:0004653	14	2779	1.88154e-09	0.106834	0.0334973	0.575574	0.788115	MF	polypeptide N-acetylgalactosaminyltransferase activity
GO:0045087	34	4271	2.26531e-09	0.10683	0.0334911	0.575615	0.788115	BP	innate immune response
GO:0035289	13	1979	1.84323e-09	0.106822	0.0334951	0.575677	0.788115	BP	posterior head segmentation
GO:0045610	14	4246	2.14394e-09	0.106804	0.0335744	0.575738	0.788115	BP	regulation of hemocyte differentiation
GO:0042127	30	5454	1.98041e-09	0.106794	0.033535	0.575868	0.788115	BP	regulation of cell proliferation
GO:0004568	18	1570	1.97939e-09	0.10679	0.0335087	0.575925	0.788115	MF	chitinase activity
GO:0006032	15	1383	1.76695e-09	0.106765	0.0335077	0.576135	0.788115	BP	chitin catabolic process
GO:0032968	10	1119	1.08638e-09	0.106765	0.0335031	0.576146	0.788115	BP	positive regulation of transcription elongation from RNA polymerase II promoter
GO:0008630	10	543	1.18246e-09	0.106749	0.0334956	0.576285	0.788115	BP	intrinsic apoptotic signaling pathway in response to DNA damage
GO:0016758	11	1397	1.62722e-09	0.106739	0.0334745	0.576391	0.788115	MF	transferase activity, transferring hexosyl groups
GO:0006644	10	998	2.25028e-09	0.106737	0.0334991	0.57638	0.788115	BP	phospholipid metabolic process
GO:0030178	27	6911	3.19714e-09	0.106735	0.0335235	0.576367	0.788115	BP	negative regulation of Wnt signaling pathway
GO:0044212	11	3695	1.98182e-09	0.106731	0.0335353	0.576392	0.788115	MF	transcription regulatory region DNA binding
GO:0003714	19	3143	3.00605e-09	0.106724	0.0334826	0.576506	0.788115	MF	transcription corepressor activity
GO:0016607	10	1610	1.20708e-09	0.106721	0.0335231	0.576488	0.788115	CC	nuclear speck
GO:0006302	13	866	1.67715e-09	0.106709	0.0334877	0.576626	0.788115	BP	double-strand break repair
GO:0045165	21	4867	2.21062e-09	0.106706	0.0334666	0.576674	0.788115	BP	cell fate commitment
GO:0007031	16	605	1.22376e-09	0.106703	0.0335047	0.576663	0.788115	BP	peroxisome organization
GO:0035277	21	7582	3.73246e-09	0.106691	0.0336076	0.57664	0.788115	BP	spiracle morphogenesis, open tracheal system
GO:0045495	13	627	1.40227e-09	0.106687	0.0335135	0.576783	0.788115	CC	pole plasm
GO:0042067	30	11044	7.21796e-10	0.106678	0.0334561	0.576921	0.788115	BP	establishment of ommatidial planar polarity
GO:0007051	12	1115	1.87738e-09	0.106658	0.0335166	0.577024	0.788115	BP	spindle organization
GO:0031523	11	339	6.35129e-10	0.10665	0.0335016	0.577102	0.788115	CC	Myb complex
GO:0005838	24	495	9.18682e-10	0.106649	0.0334943	0.577124	0.788115	CC	proteasome regulatory particle
GO:0045035	10	1674	1.72717e-09	0.106648	0.0334836	0.57714	0.788115	BP	sensory organ precursor cell division
GO:0032509	13	757	9.9679e-10	0.106645	0.0335149	0.577132	0.788115	BP	endosome transport via multivesicular body sorting pathway
GO:0008062	10	815	1.04198e-09	0.106638	0.0335001	0.577207	0.788115	BP	eclosion rhythm
GO:0003756	11	425	9.31729e-10	0.106637	0.0334922	0.57722	0.788115	MF	protein disulfide isomerase activity
GO:0006727	19	971	0.0676296	0.106637	0.0337687	0.5769	0.788115	BP	ommochrome biosynthetic process
GO:0007525	22	5770	2.97162e-09	0.106631	0.0335549	0.577204	0.788115	BP	somatic muscle development
GO:0045498	10	979	2.50361e-09	0.10663	0.0335017	0.577274	0.788115	BP	sex comb development
GO:0010508	11	953	1.44953e-09	0.106629	0.0335143	0.577265	0.788115	BP	positive regulation of autophagy
GO:0007526	15	3931	2.42019e-09	0.106622	0.0335448	0.57729	0.788115	BP	larval somatic muscle development
GO:0016887	44	3173	0.102634	0.10662	0.0307764	0.580594	0.788115	MF	ATPase activity
GO:0016571	15	689	1.12011e-09	0.106612	0.0335149	0.577403	0.788115	BP	histone methylation
GO:0044666	11	465	6.41764e-10	0.10661	0.0335183	0.577421	0.788115	CC	MLL3/4 complex
GO:0008010	99	3080	3.44757e-09	0.106602	0.0335121	0.577496	0.788115	MF	structural constituent of chitin-based larval cuticle
GO:0007301	10	3363	1.86752e-09	0.106598	0.0334914	0.57755	0.788115	BP	female germline ring canal formation
GO:0007447	11	2907	0.0639637	0.106591	0.0330034	0.578185	0.788115	BP	imaginal disc pattern formation
GO:0007400	27	6599	7.70317e-10	0.106581	0.0334216	0.577771	0.788115	BP	neuroblast fate determination
GO:0051537	15	683	1.32494e-09	0.106559	0.0334896	0.577873	0.788115	MF	2 iron, 2 sulfur cluster binding
GO:0008593	28	2616	2.12769e-09	0.106555	0.0334757	0.577926	0.788115	BP	regulation of Notch signaling pathway
GO:0009792	10	334	8.35309e-10	0.106554	0.033498	0.577907	0.788115	BP	embryo development ending in birth or egg hatching
GO:0006950	22	1052	1.57463e-09	0.106552	0.033486	0.577937	0.788115	BP	response to stress
GO:0050662	10	355	7.17846e-10	0.106552	0.0335003	0.577922	0.788115	MF	coenzyme binding
GO:0004402	22	843	1.46616e-09	0.106551	0.0335012	0.577927	0.788115	MF	histone acetyltransferase activity
GO:0000124	19	1011	1.29959e-09	0.106544	0.0336052	0.577869	0.788115	CC	SAGA complex
GO:0035006	10	669	1.71479e-09	0.106539	0.033502	0.578025	0.788115	BP	melanization defense response
GO:0007405	20	2814	1.07561e-09	0.106533	0.0335317	0.578043	0.788115	BP	neuroblast proliferation
GO:0010171	20	309	1.00228e-09	0.106518	0.0334993	0.578211	0.788115	BP	body morphogenesis
GO:0016236	10	735	1.77827e-09	0.106506	0.0334988	0.578309	0.788115	BP	macroautophagy
GO:0016579	12	673	2.46026e-09	0.106495	0.0334983	0.578398	0.788115	BP	protein deubiquitination
GO:0042594	29	3687	3.18559e-09	0.106493	0.0334967	0.578419	0.788115	BP	response to starvation
GO:0035099	18	3798	2.6618e-09	0.10649	0.0334817	0.578461	0.788115	BP	hemocyte migration
GO:0016266	12	580	9.90658e-10	0.10649	0.0334912	0.578451	0.788115	BP	O-glycan processing
GO:0055088	10	1629	2.49111e-09	0.106488	0.0335272	0.578425	0.788115	BP	lipid homeostasis
GO:0006606	24	849	1.57233e-09	0.106478	0.0334896	0.578552	0.788115	BP	protein import into nucleus
GO:0007030	61	4184	2.9725e-09	0.106466	0.0334913	0.578651	0.788115	BP	Golgi organization
GO:0008553	20	407	1.41326e-09	0.106446	0.0334965	0.578806	0.788115	MF	hydrogen-exporting ATPase activity, phosphorylative mechanism
GO:0048489	14	2223	2.06506e-09	0.106416	0.0334658	0.579098	0.788115	BP	synaptic vesicle transport
GO:0005604	12	3305	1.98233e-09	0.106407	0.0337699	0.578811	0.788115	CC	basement membrane
GO:0006749	38	1089	1.64228e-09	0.106399	0.0335219	0.579168	0.788115	BP	glutathione metabolic process
GO:0001964	15	4564	0.11123	0.106378	0.0347444	0.577897	0.788115	BP	startle response
GO:0004674	170	25024	4.20052e-11	0.106377	0.0334943	0.579391	0.788115	MF	protein serine/threonine kinase activity
GO:0045861	21	731	1.63666e-09	0.106372	0.0334792	0.579444	0.788115	BP	negative regulation of proteolysis
GO:0005794	91	8972	4.22005e-09	0.106345	0.0334632	0.579694	0.788115	CC	Golgi apparatus
GO:0006030	99	6313	3.05117e-09	0.106342	0.0335372	0.579624	0.788115	BP	chitin metabolic process
GO:0010628	19	2717	3.33998e-09	0.106339	0.0334941	0.579701	0.788115	BP	positive regulation of gene expression
GO:0019236	14	377	9.64488e-10	0.106337	0.0335046	0.579709	0.788115	BP	response to pheromone
GO:0015991	40	1281	2.10401e-09	0.106303	0.0335478	0.579936	0.788115	BP	ATP hydrolysis coupled proton transport
GO:0006402	12	640	1.88759e-09	0.106292	0.0335002	0.580091	0.788115	BP	mRNA catabolic process
GO:0006470	79	14891	0.262637	0.106251	0.0323601	0.581826	0.788115	BP	protein dephosphorylation
GO:0009312	13	1866	4.18803e-09	0.106247	0.0334989	0.580466	0.788115	BP	oligosaccharide biosynthetic process
GO:0005694	30	1403	2.42111e-09	0.106215	0.0335622	0.580652	0.788115	CC	chromosome
GO:0006890	11	232	1.84926e-09	0.106192	0.0335259	0.580889	0.788115	BP	retrograde vesicle-mediated transport, Golgi to ER
GO:0031122	19	437	2.22973e-09	0.106177	0.033505	0.581039	0.788115	BP	cytoplasmic microtubule organization
GO:0008237	32	3873	2.71073e-09	0.106117	0.0336233	0.581395	0.788115	MF	metallopeptidase activity
GO:0001075	20	520	1.47225e-09	0.10609	0.0335413	0.58172	0.788115	MF	transcription factor activity, RNA polymerase II core promoter sequence-specific binding involved in preinitiation complex assembly
GO:0007475	19	8231	0.0685274	0.106044	0.0328722	0.582928	0.788115	BP	apposition of dorsal and ventral imaginal disc-derived wing surfaces
GO:0001558	16	1533	2.37516e-09	0.106002	0.033484	0.582523	0.788115	BP	regulation of cell growth
GO:0000287	46	4076	1.93932e-09	0.105995	0.0335506	0.582496	0.788115	MF	magnesium ion binding
GO:0008137	26	436	3.08558e-09	0.105978	0.0335192	0.582675	0.788115	MF	NADH dehydrogenase (ubiquinone) activity
GO:0000149	18	1752	2.40295e-09	0.105977	0.0334672	0.58275	0.788115	MF	SNARE binding
GO:0000139	19	1246	3.26504e-09	0.10594	0.0335194	0.582993	0.788115	CC	Golgi membrane
GO:0016772	57	1511	1.15391e-09	0.105937	0.0333867	0.583182	0.788115	MF	transferase activity, transferring phosphorus-containing groups
GO:0007294	29	3661	2.03833e-09	0.105922	0.0337718	0.582827	0.788115	BP	germarium-derived oocyte fate determination
GO:0030177	18	2844	2.44156e-09	0.105917	0.0336169	0.58306	0.788115	BP	positive regulation of Wnt signaling pathway
GO:0008134	93	13386	3.40429e-09	0.105905	0.0335021	0.583304	0.788115	MF	transcription factor binding
GO:0005665	13	279	0.0320536	0.105863	0.0328754	0.584444	0.788115	CC	DNA-directed RNA polymerase II, core complex
GO:0000151	13	644	2.28736e-09	0.105808	0.0336651	0.5839	0.788115	CC	ubiquitin ligase complex
GO:0008057	13	723	0.046716	0.105781	0.0328695	0.585137	0.788115	BP	eye pigment granule organization
GO:0016233	10	438	0.0488268	0.105778	0.0342013	0.583473	0.788115	BP	telomere capping
GO:0017056	11	661	2.55846e-09	0.105769	0.033668	0.584222	0.788115	MF	structural constituent of nuclear pore
GO:0004843	10	581	1.9456e-09	0.105769	0.0334874	0.584453	0.788115	MF	thiol-dependent ubiquitin-specific protease activity
GO:0005112	13	3313	3.10245e-09	0.105762	0.0335589	0.584418	0.788115	MF	Notch binding
GO:0004298	24	308	0.0531128	0.10574	0.0316214	0.587104	0.788115	MF	threonine-type endopeptidase activity
GO:0045879	17	4667	1.28449e-09	0.1057	0.0333718	0.585174	0.788115	BP	negative regulation of smoothened signaling pathway
GO:0005685	11	235	1.40753e-09	0.105671	0.033583	0.585139	0.788115	CC	U1 snRNP
GO:0007254	27	6412	3.7028e-09	0.105668	0.0336811	0.585038	0.788115	BP	JNK cascade
GO:0005887	184	47330	2.25385e-11	0.105647	0.0335554	0.58538	0.788115	CC	integral component of plasma membrane
GO:0007465	13	2935	2.78715e-09	0.105636	0.0334457	0.585612	0.788115	BP	R7 cell fate commitment
GO:0016458	18	1816	1.91431e-09	0.105605	0.033603	0.585667	0.788115	BP	gene silencing
GO:0008298	26	1830	2.03536e-09	0.105578	0.0338935	0.585517	0.788115	BP	intracellular mRNA localization
GO:0045172	15	2893	2.64196e-09	0.105575	0.0334516	0.586105	0.788115	CC	germline ring canal
GO:0046621	11	2809	2.52577e-09	0.10556	0.0335405	0.586114	0.788115	BP	negative regulation of organ growth
GO:0003707	18	5421	2.33606e-09	0.105477	0.0335327	0.586815	0.788115	MF	steroid hormone receptor activity
GO:0000122	147	25278	6.4385e-10	0.105477	0.0340171	0.586188	0.788115	BP	negative regulation of transcription from RNA polymerase II promoter
GO:0016263	11	683	1.48404e-09	0.105433	0.0335564	0.587147	0.788115	MF	glycoprotein-N-acetylgalactosamine 3-beta-galactosyltransferase activity
GO:0016337	22	7907	4.00768e-09	0.105385	0.0335981	0.587493	0.788115	BP	single organismal cell-cell adhesion
GO:0003755	27	851	0.0402126	0.105373	0.0340882	0.586946	0.788115	MF	peptidyl-prolyl cis-trans isomerase activity
GO:0006120	29	649	1.97717e-09	0.105366	0.0336075	0.587641	0.788115	BP	mitochondrial electron transport, NADH to ubiquinone
GO:0045466	11	3265	4.56304e-09	0.105346	0.0335897	0.587823	0.788115	BP	R7 cell differentiation
GO:0008289	20	2902	2.89077e-09	0.105333	0.0332854	0.588334	0.788115	MF	lipid binding
GO:0005703	31	3933	9.60414e-10	0.105325	0.0335009	0.58812	0.788115	CC	polytene chromosome puff
GO:0035159	23	8298	9.55924e-10	0.105322	0.0335012	0.588142	0.788115	BP	regulation of tube length, open tracheal system
GO:0035075	11	3637	1.11027e-10	0.105313	0.0337374	0.587904	0.788115	BP	response to ecdysone
GO:0004702	22	2932	3.81147e-09	0.105305	0.0337076	0.588009	0.788115	MF	receptor signaling protein serine/threonine kinase activity
GO:0005730	100	2183	0.0704846	0.105285	0.0332656	0.588764	0.788115	CC	nucleolus
GO:0004867	78	6024	7.02474e-10	0.105284	0.0334711	0.588493	0.788115	MF	serine-type endopeptidase inhibitor activity
GO:0019731	27	1238	2.78003e-09	0.105268	0.0335325	0.588544	0.788115	BP	antibacterial humoral response
GO:0005484	22	1282	2.67385e-09	0.105247	0.0334338	0.588854	0.788115	MF	SNAP receptor activity
GO:0030496	20	3801	4.07106e-09	0.10524	0.0336981	0.588561	0.788115	CC	midbody
GO:0019915	12	851	1.76228e-09	0.105231	0.0336939	0.588639	0.788115	BP	lipid storage
GO:0015171	31	3418	0.160607	0.105228	0.0301417	0.593512	0.788115	MF	amino acid transmembrane transporter activity
GO:0015276	59	3284	2.70238e-09	0.105228	0.0336159	0.588769	0.788115	MF	ligand-gated ion channel activity
GO:0006614	10	225	2.024e-09	0.10522	0.0332873	0.589269	0.788115	BP	SRP-dependent cotranslational protein targeting to membrane
GO:0032880	10	4582	0.114813	0.105184	0.0328605	0.590144	0.788115	BP	regulation of protein localization
GO:0046961	40	1300	3.82236e-09	0.105158	0.033709	0.589224	0.788115	MF	proton-transporting ATPase activity, rotational mechanism
GO:0010951	25	639	2.05965e-09	0.105094	0.0335707	0.589932	0.788115	BP	negative regulation of endopeptidase activity
GO:0016081	15	1972	2.89108e-09	0.105054	0.0334181	0.590477	0.788115	BP	synaptic vesicle docking
GO:0009416	19	4962	2.30627e-09	0.105036	0.0336719	0.590278	0.788115	BP	response to light stimulus
GO:0008360	89	17258	1.00593e-09	0.105028	0.0335199	0.590548	0.788115	BP	regulation of cell shape
GO:0051642	14	1575	2.70576e-09	0.105007	0.0334482	0.590818	0.788115	BP	centrosome localization
GO:0003951	12	3141	0.0915919	0.105003	0.0327023	0.591875	0.788115	MF	NAD+ kinase activity
GO:0009953	28	3154	1.58594e-09	0.104989	0.0335287	0.590861	0.788115	BP	dorsal/ventral pattern formation
GO:0006261	15	563	0.0224519	0.104983	0.0333807	0.59111	0.788115	BP	DNA-dependent DNA replication
GO:0035290	10	817	3.40259e-09	0.104978	0.0333878	0.591141	0.788115	BP	trunk segmentation
GO:0005652	11	332	1.3785e-09	0.104972	0.0338112	0.590613	0.788115	CC	nuclear lamina
GO:0006342	39	2899	2.18981e-09	0.104961	0.0334655	0.59118	0.788115	BP	chromatin silencing
GO:0090175	16	4033	4.03116e-09	0.104938	0.0334785	0.591351	0.788115	BP	regulation of establishment of planar polarity
GO:0030176	11	580	2.54471e-09	0.104854	0.0334525	0.592083	0.788115	CC	integral component of endoplasmic reticulum membrane
GO:0005852	18	458	1.76258e-09	0.104831	0.0336742	0.591968	0.788115	CC	eukaryotic translation initiation factor 3 complex
GO:0007218	56	9200	1.25441e-09	0.104781	0.0337401	0.592289	0.788115	BP	neuropeptide signaling pathway
GO:0051087	15	347	1.25739e-09	0.104776	0.0336068	0.592511	0.788115	MF	chaperone binding
GO:0005044	23	3190	4.07895e-09	0.104729	0.0332284	0.593428	0.788115	MF	scavenger receptor activity
GO:0007591	12	3075	3.92521e-09	0.104725	0.0335734	0.592982	0.788115	BP	molting cycle, chitin-based cuticle
GO:0031201	28	1510	2.90821e-09	0.104713	0.033426	0.593284	0.788115	CC	SNARE complex
GO:0035058	16	892	2.14628e-09	0.104668	0.0337362	0.593219	0.788115	BP	nonmotile primary cilium assembly
GO:0008088	12	1402	2.11633e-09	0.104667	0.0333692	0.593747	0.788115	BP	axo-dendritic transport
GO:0007315	16	3743	2.22421e-09	0.104659	0.0335789	0.593517	0.788115	BP	pole plasm assembly
GO:0000910	36	2290	3.68693e-09	0.104604	0.0334605	0.594135	0.788115	BP	cytokinesis
GO:0022627	40	579	4.35162e-09	0.104576	0.0334749	0.594349	0.788115	CC	cytosolic small ribosomal subunit
GO:0006726	14	590	3.15462e-09	0.104565	0.033777	0.594014	0.788115	BP	eye pigment biosynthetic process
GO:0003333	31	3455	0.160783	0.104563	0.0305606	0.598667	0.788115	BP	amino acid transmembrane transport
GO:0003697	18	709	1.43538e-09	0.104523	0.0333942	0.5949	0.788115	MF	single-stranded DNA binding
GO:0001709	27	10273	3.83361e-09	0.10452	0.0337086	0.594481	0.788115	BP	cell fate determination
GO:0051539	18	2259	3.2774e-09	0.104497	0.0335606	0.594879	0.788115	MF	4 iron, 4 sulfur cluster binding
GO:0006886	79	5494	7.01358e-10	0.104404	0.0335203	0.595703	0.788115	BP	intracellular protein transport
GO:0007088	24	1392	2.1158e-09	0.104395	0.0334805	0.595833	0.788115	BP	regulation of mitotic nuclear division
GO:0035225	10	3911	3.53736e-09	0.104392	0.0336701	0.59559	0.788115	BP	determination of genital disc primordium
GO:0007443	32	11534	0.188667	0.104351	0.0327577	0.597242	0.788115	BP	Malpighian tubule morphogenesis
GO:0007099	23	1548	4.02115e-09	0.104339	0.0337767	0.595867	0.788115	BP	centriole replication
GO:0016773	12	1168	1.95361e-09	0.104303	0.0339277	0.595948	0.788115	MF	phosphotransferase activity, alcohol group as acceptor
GO:0018345	22	1669	2.13478e-09	0.104273	0.0337979	0.596377	0.788115	BP	protein palmitoylation
GO:0008284	28	8225	4.57606e-10	0.104258	0.0336234	0.596757	0.788115	BP	positive regulation of cell proliferation
GO:0007300	13	2630	3.21352e-09	0.104242	0.0336667	0.596826	0.788115	BP	ovarian nurse cell to oocyte transport
GO:0007422	82	21401	6.39645e-11	0.104239	0.0334168	0.597212	0.788115	BP	peripheral nervous system development
GO:0016183	14	451	0.0589251	0.104204	0.034926	0.595326	0.788115	BP	synaptic vesicle coating
GO:0007419	36	10367	1.66974e-11	0.104186	0.033559	0.597443	0.788115	BP	ventral cord development
GO:0046427	21	2034	1.86523e-09	0.104154	0.0336048	0.59764	0.788115	BP	positive regulation of JAK-STAT cascade
GO:0000082	14	1402	2.29476e-09	0.104147	0.0336075	0.597693	0.788115	BP	G1/S transition of mitotic cell cycle
GO:0008343	10	3160	0.0661337	0.104143	0.0338737	0.597341	0.788115	BP	adult feeding behavior
GO:0016485	20	3723	1.26472e-09	0.104133	0.0333694	0.598158	0.788115	BP	protein processing
GO:0007265	24	5898	4.04519e-09	0.104132	0.0339818	0.597272	0.788115	BP	Ras protein signal transduction
GO:0007274	48	12728	2.43114e-11	0.104109	0.0335839	0.598038	0.788115	BP	neuromuscular synaptic transmission
GO:0007428	15	7333	5.12257e-09	0.10407	0.0333755	0.59867	0.788115	BP	primary branching, open tracheal system
GO:0008227	19	6271	5.65237e-10	0.104062	0.0334603	0.598606	0.788115	MF	G-protein coupled amine receptor activity
GO:0006260	44	1589	2.39845e-10	0.104032	0.0329975	0.599539	0.788115	BP	DNA replication
GO:0022416	60	12130	0.159477	0.104032	0.0328309	0.599794	0.788115	BP	chaeta development
GO:0000276	12	309	1.38781e-09	0.104025	0.0336751	0.598596	0.788115	CC	mitochondrial proton-transporting ATP synthase complex, coupling factor F(o)
GO:0042384	32	1865	2.30271e-09	0.104022	0.0341091	0.597983	0.788115	BP	cilium assembly
GO:0008565	28	910	0.0567268	0.10402	0.0347548	0.597058	0.788115	MF	protein transporter activity
GO:0071855	10	856	3.04315e-09	0.104012	0.0338564	0.598432	0.788115	MF	neuropeptide receptor binding
GO:0061024	15	4596	4.46233e-09	0.104011	0.0336617	0.598732	0.788115	BP	membrane organization
GO:0016082	13	2298	1.01372e-09	0.104011	0.0333998	0.59912	0.788115	BP	synaptic vesicle priming
GO:0031011	10	693	0.0217905	0.104002	0.0326855	0.600259	0.788115	CC	Ino80 complex
GO:0007306	19	769	2.25042e-09	0.103996	0.0334876	0.59911	0.788115	BP	eggshell chorion assembly
GO:0051607	14	1038	3.99602e-09	0.103956	0.0337223	0.599089	0.788115	BP	defense response to virus
GO:0019706	22	1660	2.23733e-09	0.103938	0.0338449	0.599059	0.788115	MF	protein-cysteine S-palmitoyltransferase activity
GO:0005802	18	1176	2.61707e-09	0.1039	0.0333955	0.600039	0.788115	CC	trans-Golgi network
GO:0006811	34	3803	0.126769	0.103885	0.0327238	0.601171	0.788115	BP	ion transport
GO:0043186	21	5328	0.0540268	0.103873	0.0317964	0.602687	0.788115	CC	P granule
GO:0003713	35	4694	3.29761e-09	0.103869	0.033786	0.599708	0.788115	MF	transcription coactivator activity
GO:0000902	51	6945	0.15873	0.103827	0.0335177	0.600456	0.788115	BP	cell morphogenesis
GO:0005201	27	5671	3.15129e-09	0.103822	0.0327987	0.601583	0.788115	MF	extracellular matrix structural constituent
GO:0005100	17	3886	9.12056e-11	0.103819	0.0336965	0.600252	0.788115	NA	NA
GO:0000220	18	578	1.28787e-09	0.1038	0.0339655	0.600008	0.788115	CC	vacuolar proton-transporting V-type ATPase, V0 domain
GO:0043052	15	3793	5.7299e-11	0.103784	0.0332985	0.601139	0.788115	BP	thermotaxis
GO:0006357	129	19341	8.52708e-11	0.103777	0.0333517	0.601121	0.788115	BP	regulation of transcription from RNA polymerase II promoter
GO:0001666	21	2988	2.53138e-09	0.10372	0.0335318	0.601311	0.788115	BP	response to hypoxia
GO:0005214	125	4687	1.72828e-10	0.10357	0.0341779	0.601564	0.788115	MF	structural constituent of chitin-based cuticle
GO:0006457	93	3434	3.41251e-09	0.103511	0.0340453	0.602245	0.788115	BP	protein folding
GO:0030717	24	3526	1.95768e-09	0.103511	0.0339738	0.602355	0.788115	BP	karyosome formation
GO:0005705	32	1472	3.72842e-11	0.103479	0.0332921	0.603666	0.788115	CC	polytene chromosome interband
GO:0032154	19	3243	3.54364e-09	0.103458	0.0338085	0.603042	0.788115	CC	cleavage furrow
GO:0046983	48	5345	1.47559e-11	0.103438	0.0336013	0.60352	0.788115	MF	protein dimerization activity
GO:0007156	31	23438	6.04249e-10	0.103378	0.0336832	0.603884	0.788115	BP	homophilic cell adhesion via plasma membrane adhesion molecules
GO:0080019	17	1603	4.34499e-09	0.103254	0.0332291	0.60561	0.788115	MF	fatty-acyl-CoA reductase (alcohol-forming) activity
GO:0008320	11	309	1.94416e-09	0.103238	0.0337224	0.604971	0.788115	MF	protein transmembrane transporter activity
GO:0017085	10	3866	0.0472809	0.10318	0.0341105	0.604838	0.788115	BP	response to insecticide
GO:0030307	24	3279	2.63821e-09	0.10317	0.0340709	0.604978	0.788115	BP	positive regulation of cell growth
GO:0001664	20	2902	0.0939712	0.103134	0.0322113	0.608229	0.788115	MF	G-protein coupled receptor binding
GO:0007094	13	304	3.51095e-11	0.103106	0.0337112	0.606068	0.788115	BP	mitotic spindle assembly checkpoint
GO:0004930	79	19013	1.36813e-11	0.103094	0.033405	0.606647	0.788115	MF	G-protein coupled receptor activity
GO:0004497	12	433	0.0121134	0.103082	0.0334887	0.606612	0.788115	MF	monooxygenase activity
GO:0005795	31	4778	5.51931e-11	0.103077	0.0332899	0.606971	0.788115	CC	Golgi stack
GO:0007173	32	9674	8.16397e-11	0.103072	0.0333474	0.606921	0.788115	BP	epidermal growth factor receptor signaling pathway
GO:0007350	21	3928	8.61772e-10	0.103067	0.0339249	0.606045	0.788115	BP	blastoderm segmentation
GO:0007080	12	281	2.36314e-09	0.103054	0.0334525	0.606898	0.788115	BP	mitotic metaphase plate congression
GO:0016226	10	241	2.27797e-09	0.103033	0.033747	0.606601	0.788115	BP	iron-sulfur cluster assembly
GO:0005884	24	4687	4.63444e-09	0.103027	0.0336517	0.606803	0.788115	CC	actin filament
GO:0006906	10	989	4.29285e-09	0.103009	0.0334131	0.607334	0.788115	BP	vesicle fusion
GO:0045471	10	765	5.19188e-11	0.102999	0.0336033	0.607114	0.788115	BP	response to ethanol
GO:0042802	15	4182	4.59223e-09	0.102975	0.033419	0.607602	0.788115	MF	identical protein binding
GO:0007480	59	21620	9.41196e-11	0.102973	0.0336524	0.607243	0.788115	BP	imaginal disc-derived leg morphogenesis
GO:0004558	13	400	2.01699e-09	0.102944	0.033598	0.607565	0.788115	MF	alpha-1,4-glucosidase activity
GO:0035293	11	1389	0.0188368	0.102936	0.0336739	0.60751	0.788115	BP	chitin-based larval cuticle pattern formation
GO:0003746	16	1903	3.34032e-10	0.102917	0.0331839	0.608452	0.788115	MF	translation elongation factor activity
GO:0007626	14	1914	2.62494e-09	0.102872	0.0341224	0.607318	0.788115	BP	locomotory behavior
GO:0048812	104	14060	1.33445e-11	0.102868	0.033278	0.608705	0.788115	BP	neuron projection morphogenesis
GO:0035025	15	7083	0.0523284	0.102835	0.0337921	0.608147	0.788115	BP	positive regulation of Rho protein signal transduction
GO:0016059	14	4477	0.166492	0.102814	0.0328009	0.60993	0.788115	BP	deactivation of rhodopsin mediated signaling
GO:0006464	14	349	2.30518e-09	0.102807	0.0333573	0.609079	0.788115	BP	cellular protein modification process
GO:0005089	25	11922	4.58579e-11	0.102746	0.0338437	0.60879	0.788115	MF	Rho guanyl-nucleotide exchange factor activity
GO:0006887	16	1929	0.129125	0.102744	0.032825	0.610462	0.788115	BP	exocytosis
GO:0008026	25	1154	3.76662e-09	0.102722	0.0338045	0.609046	0.788115	MF	ATP-dependent helicase activity
GO:0006816	24	5256	0.0852403	0.10266	0.0329845	0.610896	0.788115	BP	calcium ion transport
GO:0005261	14	1644	0.102549	0.10265	0.0339397	0.609409	0.788115	MF	cation channel activity
GO:0005929	21	1294	0.0709668	0.102605	0.0359704	0.606513	0.788115	CC	cilium
GO:0070328	13	1752	2.67732e-09	0.102596	0.0331746	0.611104	0.788115	BP	triglyceride homeostasis
GO:0048134	10	1526	2.55315e-10	0.102535	0.0338657	0.610464	0.788115	BP	germ-line cyst formation
GO:0032934	12	241	2.47487e-09	0.102532	0.033274	0.611467	0.788115	MF	sterol binding
GO:0016573	20	501	4.06346e-09	0.102502	0.0331601	0.611902	0.788115	BP	histone acetylation
GO:0040034	10	2966	3.30034e-09	0.102496	0.0334909	0.6114	0.788115	BP	regulation of development, heterochronic
GO:0015986	18	336	2.75587e-09	0.102492	0.0335177	0.61139	0.788115	BP	ATP synthesis coupled proton transport
GO:0030514	11	1252	2.51978e-09	0.102423	0.0335107	0.611963	0.788115	BP	negative regulation of BMP signaling pathway
GO:0007391	94	26027	0.196104	0.102418	0.0337726	0.611571	0.788115	BP	dorsal closure
GO:0005938	74	19046	1.47014e-11	0.102395	0.0330999	0.612876	0.788115	CC	cell cortex
GO:0005828	11	469	3.22753e-09	0.102363	0.0335862	0.612324	0.788115	CC	kinetochore microtubule
GO:0016787	52	2871	7.90411e-10	0.102356	0.0334922	0.61254	0.788115	MF	hydrolase activity
GO:0032259	11	430	0.0471404	0.102337	0.0312283	0.616546	0.788115	BP	methylation
GO:0006963	12	1873	4.62563e-09	0.10232	0.0336968	0.612491	0.788115	BP	positive regulation of antibacterial peptide biosynthetic process
GO:0032039	14	561	2.92772e-09	0.102312	0.0335553	0.612796	0.788115	CC	integrator complex
GO:0010468	38	5954	0.00273381	0.102278	0.0332134	0.613646	0.788115	BP	regulation of gene expression
GO:0007349	41	6102	0.12654	0.102273	0.0339299	0.612486	0.788115	BP	cellularization
GO:0008380	15	490	0.037206	0.102263	0.0338482	0.612702	0.788115	BP	RNA splicing
GO:0000922	21	3092	8.88134e-10	0.102246	0.0340341	0.61253	0.788115	CC	spindle pole
GO:0004857	10	219	1.9298e-09	0.102227	0.0327505	0.614848	0.788115	MF	enzyme inhibitor activity
GO:0007307	18	1410	2.53278e-09	0.10219	0.0337181	0.613514	0.788115	BP	eggshell chorion gene amplification
GO:0007169	14	3930	1.45291e-09	0.102176	0.0334612	0.614058	0.788115	BP	transmembrane receptor protein tyrosine kinase signaling pathway
GO:0008543	11	5566	7.75469e-12	0.102158	0.0335991	0.613971	0.788115	BP	fibroblast growth factor receptor signaling pathway
GO:0005669	25	590	1.79916e-09	0.102141	0.0342698	0.612983	0.788115	CC	transcription factor TFIID complex
GO:0070050	10	932	1.42662e-10	0.102133	0.0332975	0.61469	0.788115	BP	neuron cellular homeostasis
GO:0048800	14	3913	3.3799e-10	0.102115	0.0341025	0.613468	0.788115	BP	antennal morphogenesis
GO:0045747	36	4061	3.85944e-09	0.102102	0.0344529	0.612989	0.788115	BP	positive regulation of Notch signaling pathway
GO:0008286	20	1709	0.0527175	0.10209	0.0341627	0.613573	0.788115	BP	insulin receptor signaling pathway
GO:0007157	25	13920	1.48798e-10	0.102023	0.0336541	0.614978	0.788115	BP	heterophilic cell-cell adhesion via plasma membrane cell adhesion molecules
GO:0000980	20	2763	1.12595e-09	0.101996	0.0331025	0.616139	0.788115	MF	RNA polymerase II distal enhancer sequence-specific DNA binding
GO:0004175	62	1106	7.39339e-11	0.101969	0.0337662	0.615224	0.788115	MF	endopeptidase activity
GO:0006364	27	593	0.0477367	0.101929	0.0325969	0.617567	0.788115	BP	rRNA processing
GO:0007305	14	659	3.70737e-09	0.101925	0.0335244	0.615991	0.788115	BP	vitelline membrane formation involved in chorion-containing eggshell formation
GO:0005788	10	250	0.0378628	0.101912	0.034364	0.614659	0.788115	CC	endoplasmic reticulum lumen
GO:0005764	26	1851	5.6551e-10	0.101902	0.0336487	0.615963	0.788115	CC	lysosome
GO:0004970	25	2992	0.0665613	0.101896	0.0330569	0.61704	0.788115	MF	ionotropic glutamate receptor activity
GO:0035186	17	2595	1.05696e-10	0.101889	0.0333914	0.616512	0.788115	BP	syncytial blastoderm mitotic cell cycle
GO:0016180	11	452	3.5537e-09	0.101868	0.0334992	0.616504	0.788115	BP	snRNA processing
GO:0006406	19	1530	2.95225e-11	0.101838	0.0336238	0.616526	0.788115	BP	mRNA export from nucleus
GO:0003724	16	739	2.55147e-09	0.10183	0.033902	0.616111	0.788115	MF	RNA helicase activity
GO:0007314	25	4372	2.17599e-09	0.101819	0.034	0.616036	0.788115	BP	oocyte anterior/posterior axis specification
GO:0004383	13	2808	0.0126711	0.101799	0.0335882	0.616906	0.788115	MF	guanylate cyclase activity
GO:0001654	11	3768	0.107515	0.101767	0.0330935	0.61803	0.788115	BP	eye development
GO:0004386	46	2832	2.96024e-10	0.10176	0.0333994	0.617551	0.788115	MF	helicase activity
GO:0004672	120	19470	4.94625e-10	0.101759	0.0330468	0.618179	0.788115	MF	protein kinase activity
GO:0003705	67	10647	4.32513e-10	0.101739	0.0333435	0.61782	0.788115	MF	transcription factor activity, RNA polymerase II distal enhancer sequence-specific binding
GO:0006506	16	533	0.0334104	0.101731	0.0336705	0.617316	0.788115	BP	GPI anchor biosynthetic process
GO:0007479	17	6445	5.35866e-10	0.10172	0.0337498	0.617268	0.788115	BP	leg disc proximal/distal pattern formation
GO:0006182	10	2627	0.00916377	0.101695	0.0335117	0.617884	0.788115	BP	cGMP biosynthetic process
GO:0042060	48	7330	5.06727e-12	0.101678	0.033473	0.61809	0.788115	BP	wound healing
GO:0046854	18	842	5.53415e-10	0.101666	0.03364	0.617893	0.788115	BP	phosphatidylinositol phosphorylation
GO:0000775	23	880	4.4271e-10	0.101653	0.0334258	0.618372	0.788115	CC	chromosome, centromeric region
GO:0010883	14	549	0.0594898	0.101596	0.0342606	0.617381	0.788115	BP	regulation of lipid storage
GO:0007015	73	13877	7.26843e-11	0.101544	0.033595	0.618963	0.788115	BP	actin filament organization
GO:0004871	45	9833	4.0837e-10	0.101522	0.0336829	0.618983	0.788115	MF	signal transducer activity
GO:0040014	15	3185	0.0545349	0.101516	0.0334565	0.619429	0.788115	BP	regulation of multicellular organism growth
GO:0048193	19	557	0.0554873	0.101505	0.0329532	0.620417	0.788115	BP	Golgi vesicle transport
GO:0006414	19	1909	7.30496e-12	0.101481	0.0331355	0.62029	0.788115	BP	translational elongation
GO:0000228	18	458	1.93846e-10	0.101459	0.0333765	0.620037	0.788115	CC	nuclear chromosome
GO:0006122	12	247	1.9889e-09	0.101401	0.0336273	0.620061	0.788115	BP	mitochondrial electron transport, ubiquinol to cytochrome c
GO:0070822	11	632	0.0624496	0.101365	0.0334803	0.620619	0.788115	CC	Sin3-type complex
GO:0016049	12	617	1.24942e-10	0.10136	0.0342681	0.61926	0.788115	BP	cell growth
GO:0007380	11	1527	2.95452e-09	0.10131	0.0336711	0.620717	0.788115	BP	specification of segmental identity, head
GO:0005686	17	452	2.31033e-09	0.101279	0.0335427	0.621203	0.788115	CC	U2 snRNP
GO:0030031	14	2700	3.39744e-09	0.101271	0.0338896	0.620647	0.788115	BP	cell projection assembly
GO:0008080	26	877	2.78271e-11	0.101256	0.0336454	0.621204	0.788115	MF	N-acetyltransferase activity
GO:0045455	10	857	0.048727	0.101251	0.0329165	0.622557	0.788115	BP	ecdysteroid metabolic process
GO:0002165	12	1873	1.49644e-10	0.101224	0.0339449	0.620923	0.788115	BP	instar larval or pupal development
GO:0008152	205	10912	6.31664e-10	0.101179	0.0329855	0.62302	0.788115	BP	metabolic process
GO:0048749	122	25648	3.30933e-11	0.101165	0.033214	0.622719	0.788115	BP	compound eye development
GO:0008239	10	3819	8.59627e-11	0.101126	0.0335032	0.622508	0.788115	MF	dipeptidyl-peptidase activity
GO:0007010	40	5992	4.04236e-11	0.101088	0.0338887	0.622115	0.788115	BP	cytoskeleton organization
GO:0042051	23	7424	3.61301e-09	0.101082	0.0344601	0.621138	0.788115	BP	compound eye photoreceptor development
GO:0006379	14	388	9.822e-11	0.10103	0.0328623	0.624455	0.788115	BP	mRNA cleavage
GO:0016027	10	1481	0.124086	0.101021	0.0348599	0.620909	0.788115	CC	inaD signaling complex
GO:0001736	32	9863	5.53933e-11	0.101016	0.0333921	0.623603	0.788115	BP	establishment of planar polarity
GO:0030720	15	2811	8.03093e-10	0.100959	0.0333755	0.624096	0.788115	BP	oocyte localization involved in germarium-derived egg chamber formation
GO:0071013	117	4719	3.68652e-09	0.100919	0.0339639	0.623339	0.788115	CC	catalytic step 2 spliceosome
GO:0016348	15	2859	1.40007e-09	0.100828	0.0345565	0.622986	0.788115	BP	imaginal disc-derived leg joint morphogenesis
GO:0005856	40	12973	6.47689e-10	0.100813	0.0340955	0.623951	0.788115	CC	cytoskeleton
GO:0042826	14	404	2.22768e-09	0.10076	0.0338138	0.624893	0.788115	MF	histone deacetylase binding
GO:0003887	19	784	0.00538744	0.100686	0.03392	0.625288	0.788115	MF	DNA-directed DNA polymerase activity
GO:0006289	25	712	3.33288e-09	0.100561	0.0344719	0.625265	0.788115	BP	nucleotide-excision repair
GO:0003383	11	1219	0.133451	0.100559	0.0344177	0.625381	0.788115	BP	apical constriction
GO:0016538	16	1076	2.52042e-09	0.100545	0.0342993	0.625711	0.788115	MF	cyclin-dependent protein serine/threonine kinase regulator activity
GO:0007420	44	10194	3.89582e-10	0.100512	0.033145	0.628135	0.788115	BP	brain development
GO:0006090	10	585	2.83676e-10	0.100496	0.0337429	0.627143	0.788115	BP	pyruvate metabolic process
GO:0001745	82	26455	0.276635	0.100495	0.0315178	0.631382	0.788115	BP	compound eye morphogenesis
GO:0016747	26	1511	3.44338e-09	0.100434	0.0343744	0.626455	0.788115	MF	transferase activity, transferring acyl groups other than amino-acyl groups
GO:0004714	13	3877	1.62238e-10	0.100431	0.0334838	0.628154	0.788115	MF	transmembrane receptor protein tyrosine kinase activity
GO:0003774	41	7038	0.0704769	0.100416	0.0335389	0.628172	0.788115	MF	motor activity
GO:0045476	13	2378	0.053622	0.1004	0.0329313	0.629451	0.788115	BP	nurse cell apoptotic process
GO:0004185	11	549	0.0132251	0.100397	0.0334304	0.628524	0.788115	MF	serine-type carboxypeptidase activity
GO:0007293	21	3114	5.12995e-11	0.100358	0.0337613	0.628212	0.788115	BP	germarium-derived egg chamber formation
GO:0031935	10	2253	3.01389e-09	0.100353	0.0338474	0.628094	0.788115	BP	regulation of chromatin silencing
GO:0010001	11	3346	4.04958e-10	0.100347	0.0337979	0.628236	0.788115	BP	glial cell differentiation
GO:0034472	14	550	3.50648e-09	0.100285	0.0334813	0.62933	0.788115	BP	snRNA 3'-end processing
GO:0000792	14	859	1.16951e-09	0.10025	0.0333883	0.629788	0.788115	CC	heterochromatin
GO:0005667	57	6675	1.60839e-10	0.100239	0.033388	0.629878	0.788115	CC	transcription factor complex
GO:0005643	36	1492	0.0022528	0.100239	0.03325	0.630146	0.788115	CC	nuclear pore
GO:0042381	10	696	0.0180541	0.100201	0.033309	0.630333	0.788115	BP	hemolymph coagulation
GO:0007412	15	7436	5.61528e-12	0.100196	0.0334494	0.630111	0.788115	BP	axon target recognition
GO:0005763	30	434	4.46154e-10	0.100167	0.0337227	0.629815	0.788115	CC	mitochondrial small ribosomal subunit
GO:0004003	18	819	2.2818e-10	0.10013	0.0332631	0.630998	0.788115	MF	ATP-dependent DNA helicase activity
GO:0061327	12	5636	1.31386e-10	0.100027	0.0328724	0.632582	0.788115	BP	anterior Malpighian tubule development
GO:0007113	10	388	0.00869276	0.0999816	0.0339209	0.63092	0.788115	BP	endomitotic cell cycle
GO:0030431	27	5718	1.07564e-11	0.0999728	0.0342349	0.630386	0.788115	BP	sleep
GO:0016203	31	10796	0.170941	0.0999664	0.0319802	0.634831	0.788115	BP	muscle attachment
GO:0032027	11	1343	0.062272	0.0999457	0.0326953	0.63359	0.788115	MF	myosin light chain binding
GO:0016321	31	2711	1.377e-10	0.0999323	0.0337194	0.631702	0.788115	BP	female meiosis chromosome segregation
GO:0007112	23	1048	0.0710615	0.0997831	0.0340125	0.632324	0.788115	BP	male meiosis cytokinesis
GO:0005575	1466	120745	5.69586e-10	0.0997796	0.034201	0.631986	0.788115	CC	cellular_component
GO:0045467	19	8909	3.98369e-09	0.0997729	0.0338592	0.632704	0.788115	BP	R7 cell development
GO:0005654	36	2910	3.84118e-10	0.0997532	0.0335969	0.633373	0.788115	CC	nucleoplasm
GO:0008013	10	3153	2.07644e-11	0.0997088	0.0333942	0.634127	0.788115	MF	beta-catenin binding
GO:0035215	14	4296	0.0205512	0.0996958	0.0335696	0.633886	0.788115	BP	genital disc development
GO:0048854	14	4197	0.0837117	0.0996839	0.034263	0.632624	0.788115	BP	brain morphogenesis
GO:0031647	16	4199	0.13237	0.0996281	0.0327904	0.635973	0.788115	BP	regulation of protein stability
GO:0050911	39	1936	2.77295e-10	0.0996248	0.033821	0.633958	0.788115	BP	detection of chemical stimulus involved in sensory perception of smell
GO:0050807	10	931	0.0184911	0.0995626	0.0346068	0.632912	0.788115	BP	regulation of synapse organization
GO:0043524	14	742	4.25722e-09	0.0995603	0.0330194	0.636063	0.788115	BP	negative regulation of neuron apoptotic process
GO:0019730	38	7467	7.43739e-11	0.0995572	0.0340928	0.633961	0.788115	BP	antimicrobial humoral response
GO:0045169	35	6672	0.0769957	0.0995515	0.0333111	0.635552	0.788115	CC	fusome
GO:0030163	18	594	1.32927e-09	0.0994897	0.0336259	0.635421	0.788115	BP	protein catabolic process
GO:0006468	224	38379	5.33039e-11	0.0994787	0.0333456	0.636067	0.788115	BP	protein phosphorylation
GO:0016192	104	7140	1.01822e-10	0.0994715	0.0334516	0.635913	0.788115	BP	vesicle-mediated transport
GO:0034314	11	418	0.0289055	0.0994433	0.033466	0.636111	0.788115	BP	Arp2/3 complex-mediated actin nucleation
GO:0042393	10	298	2.73806e-09	0.0994162	0.0345411	0.634194	0.788115	MF	histone binding
GO:0048515	13	577	3.58215e-09	0.0994148	0.0340559	0.635164	0.788115	BP	spermatid differentiation
GO:0003743	54	2749	0.00172838	0.0993741	0.0334795	0.636636	0.788115	MF	translation initiation factor activity
GO:0001708	26	2650	0.0113962	0.0993641	0.0338313	0.636013	0.788115	BP	cell fate specification
GO:0000022	79	2767	1.4031e-09	0.0993553	0.0335866	0.636572	0.788115	BP	mitotic spindle elongation
GO:0051258	12	640	0.00426846	0.0993347	0.0331327	0.637649	0.788115	BP	protein polymerization
GO:0005262	17	2291	2.27428e-11	0.0992633	0.034861	0.634765	0.788115	MF	calcium channel activity
GO:0007430	17	4747	0.0569896	0.0992411	0.0339469	0.636759	0.788115	BP	terminal branching, open tracheal system
GO:0007062	12	1930	2.01342e-09	0.0992358	0.0333795	0.637943	0.788115	BP	sister chromatid cohesion
GO:0005840	70	1356	8.84082e-11	0.0992318	0.0337425	0.637243	0.788115	CC	ribosome
GO:0007310	21	3625	1.33827e-11	0.0992005	0.0340559	0.636862	0.788115	BP	oocyte dorsal/ventral axis specification
GO:0007638	11	3643	1.61484e-10	0.0991992	0.0347196	0.635547	0.788115	BP	mechanosensory behavior
GO:0006417	14	2972	2.91083e-10	0.099181	0.0338779	0.637374	0.788115	BP	regulation of translation
GO:0048190	46	13076	0.156366	0.0991218	0.0330835	0.639456	0.788115	BP	wing disc dorsal/ventral pattern formation
GO:0005671	11	294	0.0263796	0.0991138	0.0324774	0.640762	0.788115	CC	Ada2/Gcn5/Ada3 transcription activator complex
GO:0006270	13	327	3.9495e-10	0.0990937	0.033919	0.637983	0.788115	BP	DNA replication initiation
GO:0006814	54	5315	0.179535	0.09909	0.035494	0.634866	0.788115	BP	sodium ion transport
GO:0048675	21	16547	0.160863	0.0990378	0.0320966	0.642164	0.788115	BP	axon extension
GO:0007220	14	2299	3.12457e-09	0.0990005	0.0341637	0.638225	0.788115	BP	Notch receptor processing
GO:0007040	11	609	0.0252073	0.0989492	0.0340828	0.638795	0.788115	BP	lysosome organization
GO:0045824	21	1109	3.30015e-09	0.098933	0.0346157	0.637844	0.788115	BP	negative regulation of innate immune response
GO:0045177	35	8431	0.159979	0.0989262	0.0345534	0.638023	0.788115	CC	apical part of cell
GO:0001104	32	1544	6.20117e-10	0.0989135	0.0340562	0.639131	0.788115	MF	RNA polymerase II transcription cofactor activity
GO:0016592	33	1544	6.20117e-10	0.0989135	0.0340562	0.639131	0.788115	CC	mediator complex
GO:0007379	22	4875	3.33927e-09	0.0989004	0.033425	0.640526	0.788115	BP	segment specification
GO:0017137	23	2557	0.0701714	0.0988966	0.0332911	0.640831	0.788115	MF	Rab GTPase binding
GO:0007413	15	7242	5.7568e-11	0.098883	0.033739	0.64002	0.788115	BP	axonal fasciculation
GO:0015030	16	355	2.38444e-09	0.0988377	0.0345647	0.638694	0.788115	CC	Cajal body
GO:0005747	37	750	4.36063e-10	0.0988128	0.0337845	0.640483	0.788115	CC	mitochondrial respiratory chain complex I
GO:0006310	16	598	3.78599e-09	0.0988026	0.0338103	0.640511	0.788115	BP	DNA recombination
GO:0042331	14	1574	4.27145e-12	0.0987884	0.0338971	0.640445	0.788115	BP	phototaxis
GO:0008354	34	4941	4.41573e-11	0.0987645	0.0337262	0.640985	0.788115	BP	germ cell migration
GO:0030162	45	5283	0.00896471	0.0987496	0.0333441	0.641894	0.788115	BP	regulation of proteolysis
GO:0004364	38	654	0.000272159	0.0987397	0.0328634	0.642973	0.788115	MF	glutathione transferase activity
GO:0004177	36	3441	5.03627e-09	0.098737	0.0344066	0.639806	0.788115	MF	aminopeptidase activity
GO:0042059	28	9401	1.32168e-10	0.0987316	0.0340232	0.640635	0.788115	BP	negative regulation of epidermal growth factor receptor signaling pathway
GO:0007266	14	3139	2.02699e-10	0.0987076	0.0339306	0.641015	0.788115	BP	Rho protein signal transduction
GO:0009966	10	436	2.70213e-10	0.0986909	0.034383	0.640217	0.788115	BP	regulation of signal transduction
GO:0046529	19	3984	1.29258e-11	0.098637	0.0340308	0.641365	0.788115	BP	imaginal disc fusion, thorax closure
GO:0042600	38	1665	1.35228e-09	0.0986297	0.0337552	0.641993	0.788115	CC	chorion
GO:0007417	82	19391	7.17105e-12	0.0985894	0.0337289	0.642367	0.788115	BP	central nervous system development
GO:0042052	33	7778	4.33252e-10	0.0985854	0.0337634	0.642327	0.788115	BP	rhabdomere development
GO:0017147	14	6434	0.0555523	0.0985397	0.0323572	0.645645	0.788115	MF	Wnt-protein binding
GO:0007605	54	10723	0.0182887	0.0984897	0.0333286	0.643994	0.788115	BP	sensory perception of sound
GO:0035222	15	3474	2.29362e-10	0.098489	0.0336163	0.643396	0.788115	BP	wing disc pattern formation
GO:0005158	12	1118	0.01812	0.0983522	0.0333045	0.645138	0.788115	MF	insulin receptor binding
GO:0007269	84	9716	2.47655e-09	0.0983181	0.033574	0.644838	0.788115	BP	neurotransmitter secretion
GO:0006633	17	499	0.0189048	0.0983028	0.0329169	0.646354	0.788115	BP	fatty acid biosynthetic process
GO:0007095	66	2205	3.44217e-10	0.0982554	0.034055	0.644319	0.788115	BP	mitotic G2 DNA damage checkpoint
GO:0046716	24	8245	5.36077e-11	0.0982326	0.0346414	0.643268	0.788115	BP	muscle cell cellular homeostasis
GO:0045214	21	4401	3.73389e-09	0.0982303	0.033317	0.646079	0.788115	BP	sarcomere organization
GO:0007398	23	8448	0.0352822	0.0982012	0.033215	0.646527	0.788115	BP	ectoderm development
GO:0005869	11	318	3.7362e-10	0.0981159	0.0335792	0.646426	0.788115	CC	dynactin complex
GO:0035010	14	1119	0.0032123	0.0980982	0.0332846	0.647196	0.788115	BP	encapsulation of foreign target
GO:0000502	28	500	0.00991411	0.0980891	0.0334627	0.646887	0.788115	CC	proteasome complex
GO:0005771	10	1307	0.00624892	0.0980409	0.0332071	0.647816	0.788115	CC	multivesicular body
GO:0008168	28	1046	0.0523375	0.0980054	0.0330114	0.64852	0.788115	MF	methyltransferase activity
GO:0007606	93	12544	1.07229e-09	0.0979353	0.0331141	0.648855	0.788115	BP	sensory perception of chemical stimulus
GO:0005778	16	1357	0.00985558	0.097915	0.0341241	0.646843	0.788115	CC	peroxisomal membrane
GO:0035327	22	2075	0.013227	0.097892	0.0332288	0.648951	0.788115	CC	transcriptionally active chromatin
GO:0016491	80	3776	2.91463e-10	0.0978852	0.0343473	0.6466	0.788115	MF	oxidoreductase activity
GO:0000221	13	493	4.30849e-10	0.0978708	0.0335985	0.648319	0.788115	CC	vacuolar proton-transporting V-type ATPase, V1 domain
GO:0000724	11	315	1.90675e-10	0.0978642	0.0337748	0.647991	0.788115	BP	double-strand break repair via homologous recombination
GO:0045570	13	9629	0.0477581	0.0978196	0.0335382	0.648853	0.788115	BP	regulation of imaginal disc growth
GO:0008233	34	2285	2.27504e-10	0.0978057	0.0340492	0.64786	0.788115	MF	peptidase activity
GO:0016319	65	18130	4.66599e-12	0.097788	0.0340279	0.648044	0.788115	BP	mushroom body development
GO:0005215	101	10721	0.233498	0.097759	0.0315384	0.653726	0.788115	MF	transporter activity
GO:0005184	34	2852	0.0149142	0.0977095	0.0337478	0.649265	0.788115	MF	neuropeptide hormone activity
GO:0005819	42	4405	0.0116065	0.0976905	0.0338115	0.649276	0.788115	CC	spindle
GO:0005868	13	1467	3.27649e-09	0.0976864	0.0334224	0.650154	0.788115	CC	cytoplasmic dynein complex
GO:0008812	14	1124	0.0506062	0.0976824	0.0330435	0.651015	0.788115	MF	choline dehydrogenase activity
GO:0007426	25	7516	1.08457e-11	0.0976636	0.0336915	0.649748	0.788115	BP	tracheal outgrowth, open tracheal system
GO:0048477	211	45188	4.03641e-10	0.0976419	0.0341917	0.648833	0.788115	BP	oogenesis
GO:0004693	16	2728	0.0100036	0.0976328	0.0332036	0.651056	0.788115	MF	cyclin-dependent protein serine/threonine kinase activity
GO:0001751	25	5889	4.74745e-11	0.0975811	0.0334324	0.650963	0.788115	BP	compound eye photoreceptor cell differentiation
GO:2000134	11	1686	2.29154e-10	0.0975613	0.0334725	0.651031	0.788115	BP	negative regulation of G1/S transition of mitotic cell cycle
GO:0050829	91	8204	0.0416108	0.0974971	0.0339425	0.650507	0.788115	BP	defense response to Gram-negative bacterium
GO:0030182	10	2489	0.0459119	0.097485	0.0331883	0.652258	0.788115	BP	neuron differentiation
GO:0008201	14	5773	0.104546	0.0974788	0.0340486	0.650418	0.788115	MF	heparin binding
GO:0051082	63	2430	1.07349e-09	0.0974323	0.0343539	0.650114	0.788115	MF	unfolded protein binding
GO:0001700	47	11488	0.0743899	0.0974128	0.0328922	0.653486	0.788115	BP	embryonic development via the syncytial blastoderm
GO:0009922	19	933	2.26443e-10	0.0973867	0.0324828	0.654607	0.788115	MF	fatty acid elongase activity
GO:0030497	19	933	2.26443e-10	0.0973867	0.0324828	0.654607	0.788115	BP	fatty acid elongation
GO:0008283	74	8313	6.95725e-11	0.0973863	0.0334076	0.652552	0.788115	BP	cell proliferation
GO:0005750	11	201	2.48747e-09	0.0973448	0.0338802	0.651834	0.788115	CC	mitochondrial respiratory chain complex III
GO:0032482	29	1020	0.0563427	0.0972795	0.0340983	0.651863	0.788115	BP	Rab protein signal transduction
GO:0031941	12	1534	0.0488056	0.0972249	0.0350811	0.650134	0.788115	CC	filamentous actin
GO:0007472	20	6381	0.0216998	0.0972124	0.0330601	0.654695	0.788115	BP	wing disc morphogenesis
GO:0030154	13	3941	0.0653591	0.0971937	0.0332258	0.654472	0.788115	BP	cell differentiation
GO:0000776	32	1771	0.0204665	0.0971623	0.0333709	0.654394	0.788115	CC	kinetochore
GO:0051297	55	2836	5.71155e-10	0.0971499	0.033612	0.653954	0.788115	BP	centrosome organization
GO:0009950	31	3458	1.67123e-09	0.0971265	0.0337571	0.653813	0.788115	BP	dorsal/ventral axis specification
GO:0008594	14	4021	5.47075e-10	0.0971213	0.033769	0.653828	0.788115	BP	photoreceptor cell morphogenesis
GO:0030723	10	2591	1.73027e-10	0.0970953	0.033017	0.655716	0.788115	BP	ovarian fusome organization
GO:0000070	23	2857	0.00285626	0.0970445	0.0342379	0.653382	0.788115	BP	mitotic sister chromatid segregation
GO:0005543	19	4671	3.73754e-09	0.0969609	0.0344696	0.653516	0.788115	MF	phospholipid binding
GO:0035172	11	2243	8.18363e-10	0.0969343	0.0335002	0.655893	0.788115	BP	hemocyte proliferation
GO:0006099	39	2601	1.3027e-10	0.0968634	0.0330919	0.657374	0.788115	BP	tricarboxylic acid cycle
GO:0006919	15	1585	0.0712966	0.0968617	0.0303813	0.66365	0.788115	BP	activation of cysteine-type endopeptidase activity involved in apoptotic process
GO:0072499	17	4329	0.0506565	0.0968356	0.0322458	0.659529	0.788115	BP	photoreceptor cell axon guidance
GO:0043195	29	5476	0.0195839	0.0967371	0.0335556	0.65731	0.788115	CC	terminal bouton
GO:0016442	10	492	0.00866984	0.0967221	0.0332993	0.658011	0.788115	CC	RISC complex
GO:0048666	44	7205	3.72798e-11	0.0967024	0.0340623	0.656431	0.788115	BP	neuron development
GO:0030532	40	1063	0.0224347	0.0966881	0.0340214	0.656635	0.788115	CC	small nuclear ribonucleoprotein complex
GO:0000981	26	4561	1.45371e-09	0.0966546	0.0337447	0.657523	0.788115	MF	RNA polymerase II transcription factor activity, sequence-specific DNA binding
GO:0006813	27	13453	1.04581e-11	0.0966506	0.0340275	0.656912	0.788115	BP	potassium ion transport
GO:0035212	10	896	4.54391e-11	0.0966214	0.0332216	0.658977	0.788115	BP	cell competition in a multicellular organism
GO:0050839	23	14723	1.21606e-10	0.0966001	0.0342197	0.656867	0.788115	MF	cell adhesion molecule binding
GO:0007628	10	2413	2.89383e-09	0.09658	0.033558	0.658531	0.788115	BP	adult walking behavior
GO:0000915	17	3433	0.086783	0.0965681	0.0339764	0.657668	0.788115	BP	actomyosin contractile ring assembly
GO:0048542	17	5503	3.56993e-11	0.0965395	0.0331939	0.659683	0.788115	BP	lymph gland development
GO:0005267	13	7323	1.33971e-09	0.0965317	0.0339492	0.658013	0.788115	MF	potassium channel activity
GO:0046329	15	2648	0.0730576	0.0964717	0.0316961	0.663706	0.788115	BP	negative regulation of JNK cascade
GO:0021782	11	2001	1.02587e-09	0.0964524	0.0342677	0.6579	0.788115	BP	glial cell development
GO:0004721	10	1141	3.27458e-09	0.0964016	0.0345587	0.657629	0.788115	MF	phosphoprotein phosphatase activity
GO:0007076	23	2865	7.1474e-10	0.0963787	0.0334277	0.6604	0.788115	BP	mitotic chromosome condensation
GO:0006096	26	1029	3.12317e-11	0.0963667	0.0335623	0.660183	0.788115	BP	glycolytic process
GO:0050832	46	5026	0.0674456	0.0963551	0.0339537	0.659371	0.788115	BP	defense response to fungus
GO:0030111	15	1345	9.86329e-11	0.0963436	0.0336181	0.660234	0.788115	BP	regulation of Wnt signaling pathway
GO:0016201	11	4898	2.72294e-11	0.0963402	0.034285	0.658726	0.788115	BP	synaptic target inhibition
GO:0006635	18	816	2.83428e-09	0.0962848	0.033334	0.66135	0.788115	BP	fatty acid beta-oxidation
GO:0000042	11	1755	4.67933e-09	0.0962439	0.0347616	0.658376	0.788115	BP	protein targeting to Golgi
GO:0007552	33	5650	2.30271e-12	0.0962273	0.03327	0.661948	0.788115	BP	metamorphosis
GO:0016333	10	2615	0.00180761	0.0962113	0.0334263	0.661708	0.788115	BP	morphogenesis of follicular epithelium
GO:0045793	23	3123	0.0233919	0.0962014	0.0328714	0.663082	0.788115	BP	positive regulation of cell size
GO:0032543	17	230	5.22533e-10	0.0961608	0.0336718	0.661529	0.788115	BP	mitochondrial translation
GO:0005179	30	1580	0.0392278	0.096144	0.0342067	0.660419	0.788115	MF	hormone activity
GO:0008105	17	4764	5.22434e-10	0.0961143	0.0327474	0.664057	0.788115	BP	asymmetric protein localization
GO:0050912	12	535	4.71283e-10	0.0960955	0.0341512	0.660921	0.788115	BP	detection of chemical stimulus involved in sensory perception of taste
GO:0002121	46	19767	0.0252332	0.096059	0.0331541	0.663532	0.788115	BP	inter-male aggressive behavior
GO:0017111	25	3983	0.0151336	0.0959969	0.0336043	0.662959	0.788115	MF	nucleoside-triphosphatase activity
GO:0048814	18	7576	0.0323272	0.095897	0.0326351	0.666029	0.788115	BP	regulation of dendrite morphogenesis
GO:0008362	17	4434	0.0898561	0.0958664	0.0343048	0.662326	0.788115	BP	chitin-based embryonic cuticle biosynthetic process
GO:0008235	15	2321	0.00354553	0.0958036	0.0330339	0.665809	0.788115	MF	metalloexopeptidase activity
GO:0035050	19	4501	4.73445e-09	0.0958027	0.0339826	0.663571	0.788115	BP	embryonic heart tube development
GO:0008527	60	2190	0.00465678	0.0957831	0.0341069	0.66343	0.788115	MF	taste receptor activity
GO:0006487	13	1469	5.46248e-11	0.095758	0.0337217	0.664531	0.788115	BP	protein N-linked glycosylation
GO:0045746	37	10024	3.7566e-11	0.095745	0.032867	0.666664	0.788115	BP	negative regulation of Notch signaling pathway
GO:0006964	11	1236	0.0152068	0.0957383	0.0334409	0.665349	0.788115	BP	positive regulation of biosynthetic process of antibacterial peptides active against Gram-negative bacteria
GO:0005524	613	71337	1.69094e-09	0.0957192	0.0337383	0.664792	0.788115	MF	ATP binding
GO:0035002	11	978	0.0388483	0.0956878	0.0333888	0.665864	0.788115	BP	liquid clearance, open tracheal system
GO:0046627	12	4644	0.101238	0.0956494	0.0333879	0.666165	0.788115	BP	negative regulation of insulin receptor signaling pathway
GO:0048042	11	770	2.22233e-09	0.0955964	0.0343199	0.664361	0.788115	BP	regulation of post-mating oviposition
GO:0008406	35	12112	1.01506e-11	0.0954872	0.0337185	0.666628	0.788115	BP	gonad development
GO:0002805	10	2490	4.96757e-10	0.0954563	0.03381	0.666648	0.788115	BP	regulation of antimicrobial peptide biosynthetic process
GO:0051726	82	8165	0.084579	0.0954061	0.0318761	0.671722	0.788115	BP	regulation of cell cycle
GO:0008544	14	2419	2.75182e-09	0.0953782	0.0340703	0.666626	0.788115	BP	epidermis development
GO:0060025	13	3331	0.0868302	0.0953344	0.0337775	0.667664	0.788115	BP	regulation of synaptic activity
GO:0009649	11	2900	0.0185681	0.0953283	0.0348459	0.665161	0.788115	BP	entrainment of circadian clock
GO:0007317	25	2673	0.0363244	0.0953247	0.0347671	0.665375	0.788115	BP	regulation of pole plasm oskar mRNA localization
GO:0005355	15	2445	4.39558e-11	0.0952941	0.033724	0.668103	0.788115	MF	glucose transmembrane transporter activity
GO:0005234	35	3688	0.041151	0.0952568	0.0336264	0.668625	0.788115	MF	extracellular-glutamate-gated ion channel activity
GO:0003735	168	2436	0.0708439	0.0952158	0.033519	0.669201	0.788115	MF	structural constituent of ribosome
GO:0016246	21	3245	0.0930593	0.0952155	0.0332889	0.669761	0.788115	BP	RNA interference
GO:0042752	12	1621	3.59418e-10	0.0952134	0.0332178	0.66995	0.788115	BP	regulation of circadian rhythm
GO:0050909	64	4007	0.00537731	0.0952012	0.033936	0.668305	0.788115	BP	sensory perception of taste
GO:0008188	43	12168	8.36666e-11	0.0951871	0.0341048	0.668007	0.788115	MF	neuropeptide receptor activity
GO:0003725	14	2222	2.28739e-10	0.0951845	0.0344048	0.667306	0.788115	MF	double-stranded RNA binding
GO:0050907	12	720	0.0359607	0.0951839	0.0327211	0.671391	0.788115	BP	detection of chemical stimulus involved in sensory perception
GO:0060439	18	4191	0.036892	0.0951599	0.0333866	0.669953	0.788115	BP	trachea morphogenesis
GO:0003682	107	7122	1.36229e-10	0.0951043	0.033893	0.669152	0.788115	MF	chromatin binding
GO:0003779	113	27990	6.94989e-10	0.0950956	0.0353416	0.665745	0.788115	MF	actin binding
GO:0016310	27	4257	0.081089	0.0950891	0.0335309	0.670147	0.788115	BP	phosphorylation
GO:0007186	128	28255	0.013466	0.0950719	0.0337972	0.669633	0.788115	BP	G-protein coupled receptor signaling pathway
GO:0007280	25	6172	1.00592e-10	0.0950602	0.0339247	0.669413	0.788115	BP	pole cell migration
GO:0005316	18	1891	3.41288e-11	0.095017	0.0334059	0.671008	0.788115	MF	high-affinity inorganic phosphate:sodium symporter activity
GO:0000932	12	457	0.0485322	0.0949955	0.0324703	0.673475	0.788115	CC	cytoplasmic mRNA processing body
GO:0042623	63	9804	1.41668e-09	0.0949949	0.0341981	0.66925	0.788115	MF	ATPase activity, coupled
GO:0000226	27	3934	0.0462853	0.0949835	0.0335377	0.670943	0.788115	BP	microtubule cytoskeleton organization
GO:0007140	33	1541	0.0649407	0.0949025	0.0328635	0.673225	0.788115	BP	male meiosis
GO:0005770	26	3792	0.0555473	0.0949004	0.0324497	0.674266	0.788115	CC	late endosome
GO:0004872	46	18736	2.00791e-10	0.0948982	0.0340911	0.670247	0.788115	MF	receptor activity
GO:0045926	10	1171	1.41738e-10	0.0948867	0.0336847	0.671327	0.788115	BP	negative regulation of growth
GO:0000339	10	267	0.0286409	0.0948509	0.0340915	0.670607	0.788115	MF	RNA cap binding
GO:0045187	12	3413	0.0380866	0.094781	0.0343576	0.67049	0.788115	BP	regulation of circadian sleep/wake cycle, sleep
GO:0040008	21	3974	3.29424e-11	0.0947735	0.0334408	0.672795	0.788115	BP	regulation of growth
GO:0008272	11	780	0.0755347	0.0947587	0.03295	0.674123	0.788115	BP	sulfate transport
GO:0001078	21	3222	6.29481e-11	0.0947367	0.0344019	0.670719	0.788115	MF	transcriptional repressor activity, RNA polymerase II core promoter proximal region sequence-specific binding
GO:0007362	27	4951	7.31976e-11	0.0947222	0.0334633	0.673133	0.788115	BP	terminal region determination
GO:0051015	13	1682	0.0123092	0.0947085	0.0329831	0.674429	0.788115	MF	actin filament binding
GO:0006396	23	759	6.99044e-10	0.0947084	0.0341647	0.671514	0.788115	BP	RNA processing
GO:0055059	31	5120	2.85776e-09	0.0946844	0.036428	0.666234	0.788115	BP	asymmetric neuroblast division
GO:0016209	11	306	2.23992e-09	0.0946655	0.0333056	0.673959	0.788115	MF	antioxidant activity
GO:0035160	12	5011	0.0299043	0.0946481	0.0335042	0.673601	0.788115	BP	maintenance of epithelial integrity, open tracheal system
GO:0007369	25	3341	0.00389116	0.09464	0.0338755	0.672745	0.788115	BP	gastrulation
GO:0007509	11	4308	0.0137115	0.0946394	0.0342457	0.67184	0.788115	BP	mesoderm migration involved in gastrulation
GO:0007005	29	1176	0.0689321	0.0945708	0.0340829	0.672762	0.788115	BP	mitochondrion organization
GO:0007016	17	2914	0.0242022	0.0945536	0.0337922	0.673611	0.788115	BP	cytoskeletal anchoring at plasma membrane
GO:0043401	18	5805	1.0603e-09	0.094503	0.0339752	0.673543	0.788115	BP	steroid hormone mediated signaling pathway
GO:0008307	14	5476	2.48806e-09	0.0944859	0.0345285	0.672309	0.788115	MF	structural constituent of muscle
GO:0003899	28	765	4.19254e-11	0.0943932	0.0341329	0.673988	0.788115	MF	DNA-directed RNA polymerase activity
GO:0009888	20	2096	1.09801e-09	0.0943802	0.0341474	0.67405	0.788115	BP	tissue development
GO:0045792	17	4541	0.0664356	0.0943501	0.0340214	0.674592	0.788115	BP	negative regulation of cell size
GO:0043169	15	352	0.0227082	0.0943119	0.0330508	0.677313	0.788115	MF	cation binding
GO:0015078	14	398	2.82697e-09	0.0942903	0.0349408	0.672768	0.788115	MF	hydrogen ion transmembrane transporter activity
GO:0003993	12	884	0.0151833	0.0942714	0.0339995	0.675244	0.788115	MF	acid phosphatase activity
GO:0006184	50	6324	0.0658516	0.0942291	0.0329988	0.678081	0.788115	NA	NA
GO:0050821	24	1701	0.0448431	0.0942049	0.0318644	0.681158	0.788115	BP	protein stabilization
GO:0005768	27	4546	0.0591548	0.0941827	0.0323721	0.680031	0.788115	CC	endosome
GO:0006397	20	1994	1.81716e-10	0.0941569	0.0339871	0.676144	0.788115	BP	mRNA processing
GO:0010629	56	6801	0.119637	0.094142	0.0326878	0.67954	0.788115	BP	negative regulation of gene expression
GO:0005925	20	7235	0.128648	0.0941278	0.0335746	0.677402	0.788115	CC	focal adhesion
GO:0008049	39	8744	0.0157041	0.0941198	0.0331102	0.678638	0.788115	BP	male courtship behavior
GO:0030145	17	1214	0.0328855	0.0941102	0.0323346	0.680688	0.788115	MF	manganese ion binding
GO:0043066	47	6276	1.99644e-10	0.0940744	0.0345944	0.675249	0.788115	BP	negative regulation of apoptotic process
GO:0007528	37	6104	0.00935272	0.0940714	0.0350653	0.674101	0.788115	BP	neuromuscular junction development
GO:0015012	12	2677	0.024531	0.0940687	0.0329836	0.679351	0.788115	BP	heparan sulfate proteoglycan biosynthetic process
GO:0009612	13	3140	0.0123152	0.0940548	0.0338714	0.67721	0.788115	BP	response to mechanical stimulus
GO:0007264	41	5679	4.28892e-11	0.0940141	0.032506	0.680991	0.788115	BP	small GTPase mediated signal transduction
GO:0030424	51	18747	1.03026e-09	0.0939657	0.0337057	0.678304	0.788115	CC	axon
GO:0005096	25	3844	0.028545	0.0939165	0.0336309	0.678868	0.788115	MF	GTPase activator activity
GO:0007450	10	1476	0.0389214	0.0938714	0.0330572	0.680674	0.788115	BP	dorsal/ventral pattern formation, imaginal disc
GO:0007049	14	539	0.00721519	0.0938491	0.0339179	0.678651	0.788115	BP	cell cycle
GO:0003824	82	5705	0.139869	0.0938434	0.0325042	0.68231	0.788115	MF	catalytic activity
GO:0015035	22	491	0.0433734	0.0938119	0.0345725	0.677277	0.788115	MF	protein disulfide oxidoreductase activity
GO:0006901	11	342	0.0254028	0.0937911	0.034826	0.676796	0.788115	BP	vesicle coating
GO:0008293	34	5436	6.53809e-10	0.0937636	0.033784	0.679638	0.788115	BP	torso signaling pathway
GO:0004806	27	2190	0.0720553	0.0937426	0.032803	0.682314	0.788115	MF	triglyceride lipase activity
GO:0016791	21	879	0.0629927	0.093705	0.033994	0.679547	0.788115	MF	phosphatase activity
GO:0005886	419	116231	2.45614e-10	0.0936611	0.0338647	0.680208	0.788115	CC	plasma membrane
GO:0008582	26	6283	2.88702e-09	0.0936421	0.0353321	0.676636	0.788115	BP	regulation of synaptic growth at neuromuscular junction
GO:0048471	41	11848	0.121664	0.0936162	0.0338131	0.68068	0.788115	CC	perinuclear region of cytoplasm
GO:0004879	22	6984	2.57654e-09	0.0936092	0.0343279	0.679418	0.788115	MF	RNA polymerase II transcription factor activity, ligand-activated sequence-specific DNA binding
GO:0000079	15	360	2.00951e-07	0.0935857	0.0333256	0.682164	0.788115	BP	regulation of cyclin-dependent protein serine/threonine kinase activity
GO:0030165	10	3988	0.0200131	0.0935253	0.0326686	0.684326	0.788115	MF	PDZ domain binding
GO:0003954	29	632	2.18702e-09	0.09352	0.0338126	0.681408	0.788115	MF	NADH dehydrogenase activity
GO:0070491	14	4271	0.0989208	0.0935108	0.0348094	0.678932	0.788115	MF	repressing transcription factor binding
GO:0031410	19	1651	1.40522e-10	0.093488	0.034468	0.679971	0.788115	CC	cytoplasmic vesicle
GO:0007131	25	1084	1.20408e-10	0.093472	0.0347515	0.679368	0.788115	BP	reciprocal meiotic recombination
GO:0005814	21	1865	0.00724947	0.0934532	0.0326333	0.684971	0.788115	CC	centriole
GO:0007283	99	6514	8.12507e-11	0.0934462	0.0349406	0.679081	0.788115	BP	spermatogenesis
GO:0005762	48	553	4.84213e-10	0.0934246	0.033108	0.683952	0.788115	CC	mitochondrial large ribosomal subunit
GO:0007423	62	13584	0.0617967	0.0934153	0.0340453	0.681599	0.788115	BP	sensory organ development
GO:0000242	10	690	2.6723e-10	0.0934142	0.034237	0.681116	0.788115	CC	pericentriolar material
GO:0007494	30	9614	4.51874e-11	0.0933816	0.034061	0.681812	0.788115	BP	midgut development
GO:0034703	10	1413	0.0544828	0.0933449	0.0336238	0.683218	0.788115	CC	cation channel complex
GO:0030381	10	1672	2.23263e-10	0.0933441	0.0330803	0.684637	0.788115	BP	chorion-containing eggshell pattern formation
GO:0006366	48	4337	1.44704e-09	0.0933175	0.0344394	0.681321	0.788115	BP	transcription from RNA polymerase II promoter
GO:0030036	49	12775	1.37935e-10	0.0933079	0.0340649	0.682356	0.788115	BP	actin cytoskeleton organization
GO:0045451	32	3707	0.00874086	0.0933079	0.0347457	0.680608	0.788115	BP	pole plasm oskar mRNA localization
GO:0007303	15	3600	0.0151193	0.0932931	0.0341328	0.682292	0.788115	BP	cytoplasmic transport, nurse cell to oocyte
GO:0042787	20	1747	0.0202119	0.0932549	0.0333034	0.684731	0.788115	BP	protein ubiquitination involved in ubiquitin-dependent protein catabolic process
GO:0005085	29	8941	1.05833e-10	0.0932524	0.0344941	0.681667	0.788115	MF	guanyl-nucleotide exchange factor activity
GO:0016476	18	3068	0.110906	0.093251	0.0330491	0.685425	0.788115	BP	regulation of embryonic cell shape
GO:0050808	16	5181	0.00551648	0.0932102	0.0334328	0.684733	0.788115	BP	synapse organization
GO:0007279	17	1526	1.37486e-09	0.0931373	0.0342288	0.683212	0.788115	BP	pole cell formation
GO:0000790	21	1229	0.00649094	0.093124	0.0326739	0.687378	0.788115	CC	nuclear chromatin
GO:0007455	25	6316	0.118894	0.0930852	0.0345193	0.68285	0.788115	BP	eye-antennal disc morphogenesis
GO:0051533	16	1398	9.02404e-11	0.0930631	0.0334944	0.685683	0.788115	BP	positive regulation of NFAT protein import into nucleus
GO:0017053	14	694	9.95654e-10	0.0930291	0.0341331	0.684271	0.788115	CC	transcriptional repressor complex
GO:0005797	10	643	1.35528e-10	0.0930032	0.033572	0.685931	0.788115	CC	Golgi medial cisterna
GO:0035282	10	4175	2.30459e-10	0.0929837	0.0342354	0.684344	0.788115	BP	segmentation
GO:0032312	10	1960	0.0430676	0.0929829	0.0322895	0.689475	0.788115	NA	NA
GO:0031290	11	5683	0.00984064	0.0929587	0.0334523	0.686581	0.788115	BP	retinal ganglion cell axon guidance
GO:0008355	54	15406	0.303876	0.092955	0.0373945	0.676503	0.788115	BP	olfactory learning
GO:0030261	19	586	0.039741	0.0929503	0.0335436	0.686404	0.788115	BP	chromosome condensation
GO:0034599	12	1274	2.05486e-09	0.0929225	0.0328623	0.688413	0.788115	BP	cellular response to oxidative stress
GO:0008104	54	10748	0.018518	0.0929179	0.0327775	0.688673	0.788115	BP	protein localization
GO:0006413	51	2484	0.0242678	0.0929165	0.0336405	0.686404	0.788115	BP	translational initiation
GO:0010506	24	2914	0.0209841	0.0929072	0.0344564	0.68434	0.788115	BP	regulation of autophagy
GO:0035023	10	2803	1.93924e-11	0.092843	0.0348223	0.683867	0.788115	BP	regulation of Rho protein signal transduction
GO:0046907	12	599	0.0319603	0.0928199	0.0337743	0.686778	0.788115	BP	intracellular transport
GO:0046692	14	297	0.0146264	0.0928083	0.0339827	0.686317	0.788115	BP	sperm competition
GO:0015277	11	765	0.0521273	0.092753	0.0351723	0.683624	0.788115	MF	kainate selective glutamate receptor activity
GO:0008301	23	2384	1.34489e-10	0.0927521	0.0336761	0.687546	0.788115	MF	DNA binding, bending
GO:0045887	18	7480	0.0918836	0.0927506	0.0330342	0.689259	0.788115	BP	positive regulation of synaptic growth at neuromuscular junction
GO:0000976	27	6309	4.90847e-11	0.0927082	0.0333922	0.688627	0.788115	MF	transcription regulatory region sequence-specific DNA binding
GO:0022625	51	731	0.0667228	0.0926762	0.0341522	0.686858	0.788115	CC	cytosolic large ribosomal subunit
GO:0007067	98	7989	0.0193061	0.0926732	0.0336284	0.688263	0.788115	BP	mitotic nuclear division
GO:0006812	41	13501	0.156231	0.0926242	0.0340861	0.68742	0.788115	BP	cation transport
GO:0045893	85	14845	6.83883e-10	0.0926223	0.0332504	0.689651	0.788115	BP	positive regulation of transcription, DNA-templated
GO:0035073	15	1733	0.000144615	0.0926007	0.0337943	0.688367	0.788115	BP	pupariation
GO:0030097	22	3862	2.0588e-10	0.0925414	0.0342984	0.687477	0.788115	BP	hemopoiesis
GO:0048149	50	14081	1.14516e-10	0.0924921	0.033248	0.690638	0.788115	BP	behavioral response to ethanol
GO:0016311	27	1239	4.44805e-11	0.0924288	0.0338089	0.689614	0.788115	BP	dephosphorylation
GO:0046873	10	698	0.0494558	0.0924149	0.0336567	0.690124	0.788115	MF	metal ion transmembrane transporter activity
GO:0007052	187	8242	0.0166543	0.0923473	0.0340318	0.689628	0.788115	BP	mitotic spindle organization
GO:0005249	12	8399	0.0107722	0.0923393	0.0343389	0.688871	0.788115	MF	voltage-gated potassium channel activity
GO:0010004	11	864	0.019391	0.0922692	0.0332998	0.692173	0.788115	BP	gastrulation involving germ band extension
GO:0051536	11	601	0.0166213	0.0922532	0.0325838	0.694231	0.788115	MF	iron-sulfur cluster binding
GO:0050830	39	2613	1.35889e-09	0.0922483	0.0335813	0.691572	0.788115	BP	defense response to Gram-positive bacterium
GO:0043138	11	255	0.0262478	0.092246	0.0324303	0.694702	0.788115	MF	3'-5' DNA helicase activity
GO:0046928	11	4777	0.0728708	0.0922208	0.0348059	0.688508	0.788115	BP	regulation of neurotransmitter secretion
GO:0008347	31	10566	0.174875	0.092175	0.0332472	0.693021	0.788115	BP	glial cell migration
GO:0043161	41	508	2.04863e-11	0.0920509	0.0351264	0.688906	0.788115	BP	proteasome-mediated ubiquitin-dependent protein catabolic process
GO:0072686	21	1312	0.0112564	0.092022	0.0338959	0.692411	0.788115	CC	mitotic spindle
GO:0004842	89	6572	0.0924484	0.0919343	0.0340238	0.692717	0.788115	MF	ubiquitin-protein transferase activity
GO:0009617	30	2171	0.0248152	0.0919238	0.0337597	0.693508	0.788115	BP	response to bacterium
GO:0007399	98	20922	0.0471078	0.0918586	0.0325286	0.697358	0.788115	BP	nervous system development
GO:0007304	32	5893	2.75828e-10	0.0918194	0.0335091	0.694967	0.788115	BP	chorion-containing eggshell formation
GO:0000723	13	665	0.0377679	0.0918083	0.0357338	0.689065	0.788115	BP	telomere maintenance
GO:0007442	19	4015	0.0121405	0.0917889	0.0333718	0.695569	0.788115	BP	hindgut morphogenesis
GO:0007440	11	3971	2.31181e-09	0.0917414	0.0351327	0.691154	0.788115	BP	foregut morphogenesis
GO:0045494	13	3191	0.0821876	0.0917344	0.0327734	0.697617	0.788115	BP	photoreceptor cell maintenance
GO:0005682	16	356	0.0106136	0.0917276	0.0341674	0.693857	0.788115	CC	U5 snRNP
GO:0035088	12	2953	0.0199668	0.0916774	0.0335114	0.696016	0.788115	BP	establishment or maintenance of apical/basal cell polarity
GO:0004713	39	10891	0.0504247	0.0916625	0.033272	0.696784	0.788115	MF	protein tyrosine kinase activity
GO:0006066	15	881	0.0292693	0.0916463	0.0327067	0.698462	0.788115	BP	alcohol metabolic process
GO:0045475	48	9046	2.67089e-11	0.0914542	0.0352313	0.692982	0.788115	BP	locomotor rhythm
GO:0009190	11	2548	0.106045	0.091311	0.0333821	0.699093	0.788115	BP	cyclic nucleotide biosynthetic process
GO:0001737	24	7820	1.02966e-10	0.0912691	0.0337093	0.698496	0.788115	BP	establishment of imaginal disc-derived wing hair orientation
GO:0005516	27	7521	8.1379e-11	0.0911491	0.0332299	0.700715	0.788115	MF	calmodulin binding
GO:0008092	24	12620	5.60703e-11	0.0910942	0.0352463	0.695554	0.788115	MF	cytoskeletal protein binding
GO:0001077	44	12672	1.75736e-09	0.0910765	0.034624	0.697387	0.788115	MF	transcriptional activator activity, RNA polymerase II core promoter proximal region sequence-specific binding
GO:0042742	57	2684	1.95431e-10	0.0910411	0.0352422	0.695949	0.788115	BP	defense response to bacterium
GO:0007126	21	1249	0.000719018	0.090939	0.0350042	0.697342	0.788115	BP	meiotic nuclear division
GO:0048072	13	786	0.0195836	0.0909236	0.0333496	0.702049	0.788115	BP	compound eye pigmentation
GO:0000278	53	6779	0.0909939	0.0909167	0.0334696	0.701763	0.788115	BP	mitotic cell cycle
GO:0051233	10	362	0.0273933	0.0908209	0.0346623	0.699142	0.788115	CC	spindle midzone
GO:0008344	34	6013	0.102139	0.0907116	0.0345291	0.700307	0.788115	BP	adult locomotory behavior
GO:0009058	21	1240	0.033566	0.0907081	0.0335425	0.703095	0.788115	BP	biosynthetic process
GO:0033181	14	525	3.25159e-09	0.0907074	0.0334128	0.703465	0.788115	CC	plasma membrane proton-transporting V-type ATPase complex
GO:0005509	202	42263	2.6906e-09	0.0906846	0.0341358	0.701601	0.788115	MF	calcium ion binding
GO:0031982	44	2693	0.0225049	0.0906663	0.033095	0.704667	0.788115	CC	vesicle
GO:0007602	38	8177	0.0351411	0.0906162	0.0333045	0.704442	0.788115	BP	phototransduction
GO:0006914	29	6891	2.35081e-10	0.0904861	0.0331478	0.705845	0.788115	BP	autophagy
GO:0016322	25	3095	0.0405289	0.0903114	0.0341539	0.704268	0.788115	BP	neuron remodeling
GO:0007309	15	3034	3.57991e-09	0.0903104	0.0346272	0.702942	0.788115	BP	oocyte axis specification
GO:0008021	64	7475	1.32702e-10	0.0902885	0.033157	0.707272	0.788115	CC	synaptic vesicle
GO:0051017	18	3459	0.00243506	0.0902771	0.033377	0.706727	0.788115	BP	actin filament bundle assembly
GO:0036011	11	1836	7.68022e-11	0.0902274	0.0345629	0.703723	0.788115	BP	imaginal disc-derived leg segmentation
GO:0008076	13	8231	0.019337	0.0901642	0.0345538	0.704205	0.788115	CC	voltage-gated potassium channel complex
GO:0004035	13	427	0.0227897	0.0901632	0.0344408	0.704532	0.788115	MF	alkaline phosphatase activity
GO:0005200	45	8064	3.34604e-10	0.0901472	0.0344095	0.704736	0.788115	MF	structural constituent of cytoskeleton
GO:0005634	1306	163938	2.19631e-10	0.0901391	0.0342113	0.705357	0.788115	CC	nucleus
GO:0016281	11	922	0.040385	0.0900578	0.0343204	0.705636	0.788115	CC	eukaryotic translation initiation factor 4F complex
GO:0035017	15	2895	0.113578	0.0900255	0.0360955	0.700875	0.788115	BP	cuticle pattern formation
GO:0008585	13	4674	0.0961744	0.0900156	0.0336018	0.707994	0.788115	BP	female gonad development
GO:0035071	69	10206	0.250963	0.0899912	0.0350182	0.704139	0.788115	BP	salivary gland cell autophagic cell death
GO:0006897	49	5516	0.194238	0.08989	0.0349474	0.705065	0.788115	BP	endocytosis
GO:0016222	17	1892	1.66309e-10	0.0898788	0.034408	0.706679	0.788115	CC	procollagen-proline 4-dioxygenase complex
GO:0004181	22	1338	1.46497e-10	0.0898182	0.0334898	0.709753	0.788115	MF	metallocarboxypeptidase activity
GO:0005507	19	2456	3.70109e-10	0.089807	0.0344723	0.707013	0.788115	MF	copper ion binding
GO:0005544	11	2161	1.29127e-10	0.0897376	0.0319878	0.714719	0.788115	MF	calcium-dependent phospholipid binding
GO:0006412	198	3149	0.107902	0.0897369	0.032977	0.711833	0.788115	BP	translation
GO:0016853	14	515	0.0529957	0.0897295	0.0329079	0.712088	0.788115	MF	isomerase activity
GO:0008033	16	371	0.0337633	0.0896707	0.034154	0.708908	0.788115	BP	tRNA processing
GO:0045179	27	10357	0.147266	0.0896701	0.0321365	0.71478	0.788115	CC	apical cortex
GO:0035149	12	4206	0.0231152	0.0896391	0.0337025	0.710439	0.788115	BP	lumen formation, open tracheal system
GO:0005871	32	3125	0.0762257	0.0895822	0.0350301	0.707032	0.788115	CC	kinesin complex
GO:0005975	81	5124	7.35054e-10	0.0895387	0.0335186	0.711701	0.788115	BP	carbohydrate metabolic process
GO:0006662	15	288	2.00907e-10	0.0895267	0.0332906	0.712451	0.788115	BP	glycerol ether metabolic process
GO:0018401	16	1784	0.00459036	0.0894617	0.0344254	0.70963	0.788115	BP	peptidyl-proline hydroxylation to 4-hydroxy-L-proline
GO:0031418	24	2288	9.40089e-11	0.0894325	0.0342968	0.710211	0.788115	MF	L-ascorbic acid binding
GO:0042054	12	307	0.00450748	0.0894266	0.0340552	0.710953	0.788115	MF	histone methyltransferase activity
GO:0008258	38	11085	2.70775e-10	0.0892	0.0344992	0.71129	0.788115	BP	head involution
GO:0002009	27	11741	2.11587e-09	0.0890389	0.0338614	0.714306	0.788115	BP	morphogenesis of an epithelium
GO:0005549	112	2658	0.00727303	0.0890032	0.0331966	0.716522	0.788115	MF	odorant binding
GO:0005912	39	17030	1.12035e-09	0.0889726	0.034343	0.71337	0.788115	CC	adherens junction
GO:0030170	36	2248	0.0355535	0.0888849	0.0348494	0.712517	0.788115	MF	pyridoxal phosphate binding
GO:0007377	10	4945	0.0668431	0.0888812	0.0339442	0.715193	0.788115	BP	germ-band extension
GO:0005635	35	4975	0.022175	0.0888306	0.0339842	0.715437	0.788115	CC	nuclear envelope
GO:0016360	22	6034	0.0495299	0.0887507	0.0332105	0.718302	0.788115	BP	sensory organ precursor cell fate determination
GO:0007424	109	33898	0.0341639	0.0887286	0.0334724	0.717683	0.788115	BP	open tracheal system development
GO:0007446	19	3386	0.00836385	0.0887247	0.0349532	0.713349	0.788115	BP	imaginal disc growth
GO:0007431	27	8150	0.0682314	0.0887213	0.0340469	0.716034	0.788115	BP	salivary gland development
GO:0008101	11	5648	0.0462385	0.0887083	0.0324409	0.720909	0.788115	BP	decapentaplegic signaling pathway
GO:0015629	22	4918	0.0234905	0.0886963	0.0354012	0.712244	0.788115	CC	actin cytoskeleton
GO:0004888	35	10663	0.0859575	0.0884066	0.0332981	0.720513	0.788115	MF	transmembrane signaling receptor activity
GO:0030139	12	3402	0.0222795	0.0883812	0.0336536	0.719631	0.788115	CC	endocytic vesicle
GO:0004656	25	2231	6.36394e-11	0.0883478	0.0345015	0.717344	0.788115	MF	procollagen-proline 4-dioxygenase activity
GO:0016702	25	2231	6.36394e-11	0.0883478	0.0345015	0.717344	0.788115	MF	oxidoreductase activity, acting on single donors with incorporation of molecular oxygen, incorporation of two atoms of oxygen
GO:0071805	13	4456	0.0778669	0.0882935	0.0337903	0.719847	0.788115	BP	potassium ion transmembrane transport
GO:0008039	31	17799	0.136488	0.0881589	0.03341	0.721948	0.788115	BP	synaptic target recognition
GO:0006367	63	1739	1.95313e-10	0.0878961	0.0338255	0.722564	0.788115	BP	transcription initiation from RNA polymerase II promoter
GO:0040011	18	7762	0.0076793	0.0878948	0.0340334	0.721946	0.788115	BP	locomotion
GO:0007259	12	1269	0.028959	0.0878369	0.0324676	0.727114	0.788115	BP	JAK-STAT cascade
GO:0055085	279	34912	0.129553	0.0878072	0.033674	0.723652	0.788115	BP	transmembrane transport
GO:0007629	22	5442	0.00978527	0.0877695	0.0341692	0.722421	0.788115	BP	flight behavior
GO:0002052	12	3207	2.03708e-10	0.0877532	0.0339464	0.723209	0.788115	BP	positive regulation of neuroblast proliferation
GO:0030001	10	307	0.0469147	0.0877402	0.0324771	0.727778	0.788115	BP	metal ion transport
GO:0008063	33	3856	0.0297958	0.0876836	0.034302	0.722626	0.788115	BP	Toll signaling pathway
GO:0007623	36	9305	0.0389137	0.0875775	0.0353725	0.720153	0.788115	BP	circadian rhythm
GO:0006891	12	391	6.43065e-10	0.0875016	0.0336941	0.725752	0.788115	BP	intra-Golgi vesicle-mediated transport
GO:0042438	14	494	4.61872e-10	0.0873512	0.0344652	0.724462	0.788115	BP	melanin biosynthetic process
GO:0005834	19	2428	0.0396157	0.0872669	0.0337434	0.727254	0.788115	CC	heterotrimeric G-protein complex
GO:0007632	16	2278	3.42862e-10	0.0871179	0.0361862	0.720892	0.788115	BP	visual behavior
GO:0018990	10	3306	0.0340521	0.087086	0.0347601	0.725414	0.788115	BP	ecdysis, chitin-based cuticle
GO:0055037	23	955	0.0270475	0.0870555	0.0346591	0.725934	0.788115	CC	recycling endosome
GO:0016021	1025	140476	0.0390003	0.0870135	0.0332236	0.730639	0.788115	CC	integral component of membrane
GO:0051260	16	4559	0.0229056	0.0869973	0.0343798	0.727192	0.788115	BP	protein homooligomerization
GO:0004197	22	1169	1.51688e-11	0.0869861	0.0344645	0.72701	0.788115	MF	cysteine-type endopeptidase activity
GO:0007143	31	2646	0.0944412	0.0869647	0.033904	0.72888	0.788115	BP	female meiotic division
GO:0016324	44	11130	0.395882	0.0869254	0.032755	0.732715	0.788115	CC	apical plasma membrane
GO:0007476	201	71287	0.305682	0.0868616	0.0322182	0.734844	0.788115	BP	imaginal disc-derived wing morphogenesis
GO:0031594	44	18870	0.222612	0.0866605	0.0356271	0.725712	0.788115	CC	neuromuscular junction
GO:0001738	16	6442	0.0664823	0.0866463	0.0320524	0.736892	0.788115	BP	morphogenesis of a polarized epithelium
GO:0048082	13	1710	0.0178081	0.0865208	0.0346013	0.729816	0.788115	BP	regulation of adult chitin-containing cuticle pigmentation
GO:0007611	39	15057	0.208749	0.0862999	0.0357832	0.727699	0.788115	BP	learning or memory
GO:0048137	13	1189	0.00943907	0.0862725	0.0337729	0.734109	0.788115	BP	spermatocyte division
GO:0030018	20	4307	0.0251117	0.0862052	0.0344143	0.732573	0.788115	CC	Z disc
GO:0007435	52	17556	0.0811081	0.0862028	0.0332405	0.736264	0.788115	BP	salivary gland morphogenesis
GO:0042023	17	3461	0.018473	0.0861589	0.0333213	0.736316	0.788115	BP	DNA endoreduplication
GO:0071011	142	5763	1.36199e-09	0.0861573	0.0349368	0.73128	0.788115	CC	precatalytic spliceosome
GO:0016323	27	7761	0.013605	0.0860848	0.0339508	0.734852	0.788115	CC	basolateral plasma membrane
GO:0040040	18	4584	3.85633e-12	0.0859701	0.0347632	0.733101	0.788115	BP	thermosensory behavior
GO:0009986	35	17067	0.0729795	0.0859642	0.033189	0.738087	0.788115	CC	cell surface
GO:0005759	58	2528	1.03245e-12	0.0858647	0.0359654	0.730094	0.788115	CC	mitochondrial matrix
GO:0008195	10	665	0.00322664	0.0858386	0.0351745	0.732719	0.788115	MF	phosphatidate phosphatase activity
GO:0050770	17	4972	0.00389308	0.0858336	0.033203	0.738949	0.788115	BP	regulation of axonogenesis
GO:0071456	25	8119	0.0115206	0.0857499	0.0335565	0.738407	0.788115	BP	cellular response to hypoxia
GO:0031965	12	3973	0.0291472	0.0856749	0.0349556	0.734516	0.788115	CC	nuclear membrane
GO:0007601	15	2580	0.0741806	0.0856311	0.0331047	0.740664	0.788115	BP	visual perception
GO:0045197	17	4343	0.106161	0.0855466	0.0323916	0.743532	0.788115	BP	establishment or maintenance of epithelial cell apical/basal polarity
GO:0005622	107	15882	0.0702423	0.0854882	0.031733	0.74606	0.788115	CC	intracellular
GO:0009267	20	4395	0.0621274	0.0853869	0.0332237	0.741969	0.788115	BP	cellular response to starvation
GO:0006629	66	5425	0.124341	0.0853532	0.0317371	0.74699	0.788115	BP	lipid metabolic process
GO:0015020	32	1834	1.60241e-09	0.0853048	0.0342164	0.739368	0.788115	MF	glucuronosyltransferase activity
GO:0003712	15	1639	0.0781378	0.08524	0.0340087	0.740471	0.788115	MF	transcription cofactor activity
GO:0015031	59	1960	0.0198314	0.0852086	0.0337734	0.741436	0.788115	BP	protein transport
GO:0007165	120	29805	0.110194	0.0851506	0.0324971	0.745936	0.788115	BP	signal transduction
GO:0046777	13	2426	0.0115902	0.0851438	0.0342072	0.740494	0.788115	BP	protein autophosphorylation
GO:0016328	10	3350	0.0146268	0.0851429	0.033565	0.742552	0.788115	CC	lateral plasma membrane
GO:0051298	65	2297	0.0243772	0.0850659	0.0348228	0.739067	0.788115	BP	centrosome duplication
GO:0008654	13	1224	0.0152631	0.0849839	0.0333463	0.744343	0.788115	BP	phospholipid biosynthetic process
GO:0045167	14	2409	0.106835	0.0846784	0.0331468	0.747075	0.788115	BP	asymmetric protein localization involved in cell fate determination
GO:0042803	97	23707	0.143759	0.0846411	0.0312875	0.753406	0.788115	MF	protein homodimerization activity
GO:0003924	145	12416	0.142857	0.084607	0.0329376	0.748241	0.788115	MF	GTPase activity
GO:0016079	22	3327	0.0319147	0.0844442	0.0318727	0.75284	0.788115	BP	synaptic vesicle exocytosis
GO:0046331	204	31087	0.194137	0.0844145	0.0348491	0.743367	0.788115	BP	lateral inhibition
GO:0005525	155	13108	0.0452544	0.0842704	0.0320952	0.753299	0.788115	MF	GTP binding
GO:0045211	25	8015	0.0531504	0.0842544	0.0354652	0.742463	0.788115	CC	postsynaptic membrane
GO:0005198	53	8090	0.0975265	0.084195	0.0345294	0.745867	0.788115	MF	structural molecule activity
GO:0005576	524	45704	0.335318	0.0841653	0.0330898	0.75075	0.788115	CC	extracellular region
GO:0045186	10	3266	0.0751665	0.0841356	0.0329521	0.751402	0.788115	BP	zonula adherens assembly
GO:0045787	10	1774	0.0471577	0.0840396	0.0325694	0.753311	0.788115	BP	positive regulation of cell cycle
GO:0007318	10	960	1.75542e-10	0.084002	0.0341118	0.748514	0.788115	BP	pole plasm protein localization
GO:0004004	40	1801	4.0728e-12	0.0839434	0.0338373	0.749802	0.788115	MF	ATP-dependent RNA helicase activity
GO:0019005	14	851	0.0482599	0.0839422	0.0323321	0.754756	0.788115	CC	SCF ubiquitin ligase complex
GO:0035091	25	2511	0.0256379	0.0836203	0.0333404	0.7536	0.788115	MF	phosphatidylinositol binding
GO:0016567	34	3993	0.0294106	0.0835809	0.0345125	0.750017	0.788115	BP	protein ubiquitination
GO:0000164	13	494	1.09921e-10	0.0833076	0.0354788	0.748674	0.788115	CC	protein phosphatase type 1 complex
GO:0007616	62	12454	0.0249753	0.0832984	0.0353749	0.749072	0.788115	BP	long-term memory
GO:0008023	11	596	0.0156561	0.0832917	0.0338099	0.754246	0.788115	CC	transcription elongation factor complex
GO:0042254	28	571	0.0196749	0.0832441	0.0340593	0.75374	0.788115	BP	ribosome biogenesis
GO:0034605	14	637	0.0421666	0.083124	0.0362594	0.747344	0.788115	BP	cellular response to heat
GO:0007444	34	8155	0.085058	0.0831098	0.0337385	0.755691	0.788366	BP	imaginal disc development
GO:0051124	30	9376	0.00756532	0.0827125	0.0352867	0.753194	0.788115	BP	synaptic growth at neuromuscular junction
GO:0030246	75	6537	0.0583579	0.0825239	0.0357063	0.753041	0.788115	MF	carbohydrate binding
GO:0008340	146	19674	0.09555	0.0824691	0.0354328	0.754296	0.788115	BP	determination of adult lifespan
GO:0005875	298	23733	0.0673217	0.0823328	0.0326961	0.764326	0.790345	CC	microtubule associated complex
GO:0007612	12	5886	0.0658835	0.0823043	0.034284	0.759179	0.789825	BP	learning
GO:0045727	13	2246	2.85573e-09	0.0822323	0.036147	0.753476	0.788115	BP	positive regulation of translation
GO:0007614	17	5731	0.116799	0.0822003	0.036575	0.752278	0.788115	BP	short-term memory
GO:0045202	53	11017	0.112581	0.0820377	0.0348894	0.758892	0.789825	CC	synapse
GO:0006888	25	578	0.0352808	0.0819449	0.0355069	0.757437	0.789461	BP	ER to Golgi vesicle-mediated transport
GO:0005811	204	12113	0.0563864	0.0818764	0.0345449	0.761088	0.790096	CC	lipid particle
GO:0045454	47	1170	0.0187699	0.0817127	0.0345429	0.762154	0.790096	BP	cell redox homeostasis
GO:0048067	19	1104	0.0315421	0.0816015	0.0343097	0.763657	0.790345	BP	cuticle pigmentation
GO:0008138	20	1370	8.56174e-11	0.0815495	0.0328391	0.768984	0.792752	MF	protein tyrosine/serine/threonine phosphatase activity
GO:0006520	17	736	0.0376908	0.0814309	0.0339601	0.765941	0.791054	BP	cellular amino acid metabolic process
GO:0004129	18	264	0.0115503	0.0813113	0.0345966	0.764557	0.790345	MF	cytochrome-c oxidase activity
GO:0007548	15	2795	0.0520124	0.0809503	0.0345416	0.767055	0.791483	BP	sex differentiation
GO:0007059	33	2298	0.0805362	0.0808483	0.0363716	0.761533	0.790096	BP	chromosome segregation
GO:0006955	48	5631	0.0454006	0.0806281	0.0365773	0.762227	0.790096	BP	immune response
GO:0046933	13	289	0.0264408	0.0806109	0.0322192	0.777203	0.7976	MF	proton-transporting ATP synthase activity, rotational mechanism
GO:0005913	11	4910	0.0425595	0.0802826	0.0331899	0.775948	0.7976	CC	cell-cell adherens junction
GO:0005681	60	1874	0.0548825	0.0800818	0.0348402	0.771538	0.794083	CC	spliceosomal complex
GO:0005272	31	1926	0.0434321	0.0799097	0.0351154	0.771675	0.794083	MF	sodium channel activity
GO:0043234	64	9342	0.0270724	0.0791622	0.033897	0.780554	0.799592	CC	protein complex
GO:0042981	19	3226	0.0320846	0.0786917	0.03568	0.777266	0.7976	BP	regulation of apoptotic process
GO:0031427	11	947	0.03964	0.0784291	0.0336245	0.786051	0.803047	BP	response to methotrexate
GO:0016490	23	724	2.56362e-10	0.0782793	0.0362208	0.777906	0.7976	MF	structural constituent of peritrophic membrane
GO:0051090	19	1497	0.00456883	0.078143	0.0349524	0.783145	0.801522	BP	regulation of sequence-specific DNA binding transcription factor activity
GO:0019898	17	1635	0.133948	0.0776928	0.0350201	0.785638	0.803047	CC	extrinsic component of membrane
GO:0000132	11	2155	0.0247417	0.0772363	0.0345426	0.790072	0.805048	BP	establishment of mitotic spindle orientation
GO:0017112	16	2040	0.0839717	0.076968	0.0349778	0.79014	0.805048	MF	Rab guanyl-nucleotide exchange factor activity
GO:0008306	13	4647	0.0732389	0.0767736	0.0357373	0.788615	0.804941	BP	associative learning
GO:0006325	30	2276	0.0761916	0.0762552	0.0343446	0.796625	0.809803	BP	chromatin organization
GO:0001673	12	334	0.0332675	0.076	0.0343644	0.79806	0.809803	CC	male germ cell nucleus
GO:0018991	13	617	0.0523751	0.075775	0.034717	0.79812	0.809803	BP	oviposition
GO:0050803	11	3950	0.0587768	0.0755623	0.0327395	0.80648	0.815355	BP	regulation of synapse structure or activity
GO:0000791	11	567	0.0401291	0.0751148	0.035718	0.798377	0.809803	CC	euchromatin
GO:0035003	13	3199	0.0537595	0.074386	0.0327397	0.813318	0.820554	CC	subapical complex
GO:0006458	10	377	5.07165e-11	0.0742717	0.0388235	0.792168	0.80639	BP	'de novo' protein folding
GO:0006351	55	6274	0.0524091	0.0740072	0.0349953	0.807302	0.815355	BP	transcription, DNA-templated
GO:0005789	34	1850	0.0327327	0.073815	0.0368734	0.801634	0.81238	CC	endoplasmic reticulum membrane
GO:0007268	51	15199	0.164192	0.0737701	0.0353304	0.807432	0.815355	BP	synaptic transmission
GO:0003690	21	1575	0.0173206	0.0734718	0.0357904	0.807446	0.815355	MF	double-stranded DNA binding
GO:0032483	11	1887	0.0490617	0.072568	0.0347629	0.816194	0.821993	BP	regulation of Rab protein signal transduction
GO:0008270	622	66286	0.257595	0.0723826	0.0355915	0.814201	0.820714	MF	zinc ion binding
GO:0001158	11	1187	0.0299814	0.0718194	0.0336048	0.824534	0.829655	MF	enhancer sequence-specific DNA binding
GO:0009952	20	4023	0.0271837	0.0698977	0.035199	0.828958	0.833368	BP	anterior/posterior pattern specification
GO:0035152	13	3997	0.0479842	0.0689955	0.0351683	0.833752	0.837445	BP	regulation of tube architecture, open tracheal system
GO:0003674	1607	115494	0.152845	0.066587	0.0349792	0.846529	0.849525	MF	molecular_function
GO:0045176	10	2170	0.0347622	0.0660623	0.0342435	0.851779	0.854039	BP	apical protein localization
GO:0007613	18	5692	0.120169	0.0639746	0.0351119	0.858461	0.859978	BP	memory
GO:0016020	436	52103	0.298625	0.0604832	0.0312084	0.887844	0.888627	CC	membrane
GO:0046872	272	37587	0.390732	0.057195	0.0330118	0.894741	0.894741	MF	metal ion binding
